# Supplementary material
Source: MDPI journal article supplement (https://www.mdpi.com/2071-1050/15/3/1934)
Supplement: s1 [file s1]

FACTOR

```
/VARIABLES Migrant_Per Disab_Per Overcrowded Illiteracy_Per San_Depr No_kitc  
hen HHAge_per Tenure_Notowner Dep_Ceiling Dep_Elecgas Dep_Housefac Density Wa  
t_NotPrHopipe WasteNotdisp Old_Dep FHH_WDPer NotDeg_Hmemb Floor_Depriv Wall_D  
epriv Unemp_10_64
```

```
No_Bath No_Eleclight Yound_Dep
```

```
/MISSING MEANSUB
```

```
/ANALYSIS Migrant_Per Disab_Per Overcrowded Illiteracy_Per San_Depr No_kitch  
en HHAge_per Tenure_Notowner Dep_Ceiling Dep_Elecgas Dep_Housefac Density Wat  
_NotPrHopipe WasteNotdisp Old_Dep FHH_WDPer NotDeg_Hmemb Floor_Depriv Wall_De  
priv Unemp_10_64 No_Bath
```

```
No_Eleclight Yound_Dep
```

```
/PRINT UNIVARIATE INITIAL CORRELATION SIG DET KMO INV EXTRACTION ROTATION F  
SCORE
```

```
/FORMAT SORT BLANK(.3)
```

```
/CRITERIA MINEIGEN(1) ITERATE(25)
```

```
/EXTRACTION PC
```

```
/CRITERIA ITERATE(25)
```

```
/ROTATION VARIMAX
```

```
/SAVE REG(ALL)
```

```
/METHOD=CORRELATION.
```

## Factor Analysis

```
[DataSet1] G:\Kebele _Addis Ababa\AA\Aggregate_April\HH14SE_AGGApril2020_Fina  
l_Final.sav
```

### Descriptive Statistics

|                                                                          | Mean    | Std. Deviation <sup>a</sup> | Analysis N <sup>a</sup> | Missing N |
|--------------------------------------------------------------------------|---------|-----------------------------|-------------------------|-----------|
| HHS Members with Migrant Percentage                                      | 31.76   | 9.142                       | 99                      | 0         |
| HHS Members with Disability percentage                                   | 2.34    | 1.143                       | 99                      | 0         |
| Over Crowed > 2.5 Person per room Percentage                             | 27.45   | 7.585                       | 99                      | 0         |
| % of HHS members with Educational Status Illiterate summarized by Kebele | 20.22   | 9.030                       | 99                      | 0         |
| No toilet and Pit latrine Shared Percentage                              | 55.62   | 12.899                      | 99                      | 0         |
| No Kitchen Percentage                                                    | 21.25   | 6.300                       | 99                      | 0         |
| Housing Age 20 years or more Percent                                     | 57.03   | 28.383                      | 99                      | 0         |
| Tenure Not Owner Occupied Percentage                                     | 69.0642 | 15.63401                    | 99                      | 0         |
| No Ceiling Percentage                                                    | 20.52   | 15.646                      | 99                      | 0         |
| Dep_Elecgas                                                              | 62.0968 | 14.36606                    | 99                      | 0         |
| HHS with household facilities deprivation (Radio, TV, House Phone)%      | 38.6930 | 8.90860                     | 99                      | 0         |
| Density (2007 Population census /area Ha)                                | 159.94  | 139.446                     | 99                      | 0         |
| Water not Private or House connection percent                            | 67.7361 | 9.93939                     | 99                      | 0         |
| Waste disposal percent not in Public and Private                         | 27.6860 | 20.91723                    | 99                      | 0         |
| Old Dependency Ratio                                                     | 4.9443  | 1.31267                     | 99                      | 0         |
| % of FHH with marital status widowed or divorced                         | 20.0218 | 5.84442                     | 99                      | 0         |
| Percent HHS not Degree and Above Percentage                              | 97.8025 | 1.11923                     | 99                      | 0         |
| HHS Floor Mud and Bamboo Reed(%)                                         | 39.2045 | 17.88139                    | 99                      | 0         |
| HHS Wood Mud with Thatch/Wood/Stone(%)                                   | 81.9379 | 14.75689                    | 99                      | 0         |
| Unemployment Rate 10_64 age                                              | 17.4413 | 4.21138                     | 99                      | 0         |

### Descriptive Statistics

|                                                       | Mean    | Std. Deviation <sup>a</sup> | Analysis N <sup>a</sup> | Missing N |
|-------------------------------------------------------|---------|-----------------------------|-------------------------|-----------|
| No Bath Percentage                                    | 1.61    | 1.345                       | 99                      | 0         |
| Kerosine, Candle, Fuel<br>Wood and Lamp<br>Percentage | 2.86    | 11.170                      | 99                      | 0         |
| Young Dependency Ratio                                | 32.6777 | 8.64766                     | 99                      | 0         |

a. For each variable, missing values are replaced with the variable mean.

### Correlation Matrix<sup>a</sup>

|             |                                                                                   | HHS<br>Members with<br>Migrant<br>Percentage | HHS<br>Members with<br>Disability<br>percentage | Over Crowed<br>> 2.5 Person<br>per room<br>Percentage |
|-------------|-----------------------------------------------------------------------------------|----------------------------------------------|-------------------------------------------------|-------------------------------------------------------|
| Correlation | HHS Members with<br>Migrant Percentage                                            | 1.000                                        | .020                                            | .045                                                  |
|             | HHS Members with<br>Disability percentage                                         | .020                                         | 1.000                                           | .424                                                  |
|             | Over Crowed > 2.5<br>Person per room<br>Percentage                                | .045                                         | .424                                            | 1.000                                                 |
|             | % of HHS members with<br>Educational Status<br>Illiterate summarized by<br>Kebele | .709                                         | .302                                            | .420                                                  |
|             | No toilet and Pit latrine<br>Shared Percentage                                    | .399                                         | .207                                            | .401                                                  |
|             | No Kitchen Percentage                                                             | .102                                         | .139                                            | .379                                                  |
|             | Housing Age 20 years or<br>more Percent                                           | .136                                         | .346                                            | .581                                                  |
|             | Tenure Not Owner<br>Occupied Percentage                                           | -.309                                        | .343                                            | .577                                                  |
|             | No Ceiling Percentage                                                             | .363                                         | -.012                                           | -.180                                                 |
|             | Dep_Elecgas                                                                       | .280                                         | .055                                            | .213                                                  |
|             | HHS with household<br>facilities deprivation<br>(Radio, TV, House<br>Phone)%      | .445                                         | .031                                            | .076                                                  |
|             | Density (2007 Population<br>census /area Ha)                                      | .011                                         | .353                                            | .735                                                  |

**Correlation Matrix<sup>a</sup>**

|             |                                                                          | % of HHS members with Educational Status Illiterate summarized by Kebele | No toilet and Pit latrine Shared Percentage | No Kitchen Percentage |
|-------------|--------------------------------------------------------------------------|--------------------------------------------------------------------------|---------------------------------------------|-----------------------|
| Correlation | HHS Members with Migrant Percentage                                      | .709                                                                     | .399                                        | .102                  |
|             | HHS Members with Disability percentage                                   | .302                                                                     | .207                                        | .139                  |
|             | Over Crowded > 2.5 Person per room Percentage                            | .420                                                                     | .401                                        | .379                  |
|             | % of HHS members with Educational Status Illiterate summarized by Kebele | 1.000                                                                    | .681                                        | .152                  |
|             | No toilet and Pit latrine Shared Percentage                              | .681                                                                     | 1.000                                       | .002                  |
|             | No Kitchen Percentage                                                    | .152                                                                     | .002                                        | 1.000                 |
|             | Housing Age 20 years or more Percent                                     | .053                                                                     | -.009                                       | .496                  |
|             | Tenure Not Owner Occupied Percentage                                     | -.281                                                                    | -.164                                       | .398                  |
|             | No Ceiling Percentage                                                    | .603                                                                     | .529                                        | -.231                 |
|             | Dep_Elecgas                                                              | .607                                                                     | .669                                        | -.362                 |
|             | HHS with household facilities deprivation (Radio, TV, House Phone)%      | .739                                                                     | .749                                        | -.155                 |
|             | Density (2007 Population census /area Ha)                                | .203                                                                     | .014                                        | .414                  |

**Correlation Matrix<sup>a</sup>**

|             |                                                                                   | Housing Age<br>20 years or<br>more Percent | Tenure Not<br>Owner<br>Occupied<br>Percentage | No Ceiling<br>Percentage |
|-------------|-----------------------------------------------------------------------------------|--------------------------------------------|-----------------------------------------------|--------------------------|
| Correlation | HHS Members with<br>Migrant Percentage                                            | .136                                       | -.309                                         | .363                     |
|             | HHS Members with<br>Disability percentage                                         | .346                                       | .343                                          | -.012                    |
|             | Over Crowded > 2.5<br>Person per room<br>Percentage                               | .581                                       | .577                                          | -.180                    |
|             | % of HHS members with<br>Educational Status<br>Illiterate summarized by<br>Kebele | .053                                       | -.281                                         | .603                     |
|             | No toilet and Pit latrine<br>Shared Percentage                                    | -.009                                      | -.164                                         | .529                     |
|             | No Kitchen Percentage                                                             | .496                                       | .398                                          | -.231                    |
|             | Housing Age 20 years or<br>more Percent                                           | 1.000                                      | .848                                          | -.687                    |
|             | Tenure Not Owner<br>Occupied Percentage                                           | .848                                       | 1.000                                         | -.792                    |
|             | No Ceiling Percentage                                                             | -.687                                      | -.792                                         | 1.000                    |
|             | Dep_Elecgas                                                                       | -.371                                      | -.445                                         | .708                     |
|             | HHS with household<br>facilities deprivation<br>(Radio, TV, House<br>Phone)%      | -.450                                      | -.602                                         | .893                     |
|             | Density (2007 Population<br>census /area Ha)                                      | .676                                       | .644                                          | -.479                    |

**Correlation Matrix<sup>a</sup>**

|             |                                                                          | Dep_Elecgas | HHS with household facilities deprivation (Radio, TV, House Phone)% | Density (2007 Population census /area Ha) |
|-------------|--------------------------------------------------------------------------|-------------|---------------------------------------------------------------------|-------------------------------------------|
| Correlation | HHS Members with Migrant Percentage                                      | .280        | .445                                                                | .011                                      |
|             | HHS Members with Disability percentage                                   | .055        | .031                                                                | .353                                      |
|             | Over Crowed > 2.5 Person per room Percentage                             | .213        | .076                                                                | .735                                      |
|             | % of HHS members with Educational Status Illiterate summarized by Kebele | .607        | .739                                                                | .203                                      |
|             | No toilet and Pit latrine Shared Percentage                              | .669        | .749                                                                | .014                                      |
|             | No Kitchen Percentage                                                    | -.362       | -.155                                                               | .414                                      |
|             | Housing Age 20 years or more Percent                                     | -.371       | -.450                                                               | .676                                      |
|             | Tenure Not Owner Occupied Percentage                                     | -.445       | -.602                                                               | .644                                      |
|             | No Ceiling Percentage                                                    | .708        | .893                                                                | -.479                                     |
|             | Dep_Elecgas                                                              | 1.000       | .854                                                                | -.202                                     |
|             | HHS with household facilities deprivation (Radio, TV, House Phone)%      | .854        | 1.000                                                               | -.304                                     |
|             | Density (2007 Population census /area Ha)                                | -.202       | -.304                                                               | 1.000                                     |

**Correlation Matrix<sup>a</sup>**

|             |                                                                                   | Water not<br>Private or<br>House<br>connection<br>percent | Waste<br>disposal<br>percent not in<br>Public and<br>Private | Old<br>Dependency<br>Ratio |
|-------------|-----------------------------------------------------------------------------------|-----------------------------------------------------------|--------------------------------------------------------------|----------------------------|
| Correlation | HHS Members with<br>Migrant Percentage                                            | .273                                                      | .295                                                         | .587                       |
|             | HHS Members with<br>Disability percentage                                         | .038                                                      | -.057                                                        | .350                       |
|             | Over Crowed > 2.5<br>Person per room<br>Percentage                                | .262                                                      | -.162                                                        | .305                       |
|             | % of HHS members with<br>Educational Status<br>Illiterate summarized by<br>Kebele | .532                                                      | .528                                                         | .393                       |
|             | No toilet and Pit latrine<br>Shared Percentage                                    | .771                                                      | .515                                                         | .219                       |
|             | No Kitchen Percentage                                                             | .090                                                      | -.250                                                        | .250                       |
|             | Housing Age 20 years or<br>more Percent                                           | -.137                                                     | -.658                                                        | .723                       |
|             | Tenure Not Owner<br>Occupied Percentage                                           | -.260                                                     | -.762                                                        | .369                       |
|             | No Ceiling Percentage                                                             | .596                                                      | .911                                                         | -.272                      |
|             | Dep_Elecgas                                                                       | .665                                                      | .676                                                         | -.104                      |
|             | HHS with household<br>facilities deprivation<br>(Radio, TV, House<br>Phone)%      | .764                                                      | .834                                                         | -.053                      |
|             | Density (2007 Population<br>census /area Ha)                                      | -.152                                                     | -.468                                                        | .403                       |

**Correlation Matrix<sup>a</sup>**

|             |                                                                                   | % of FHH with<br>marital status<br>widowed or<br>divorced | Percent HHS<br>not Degree<br>and Above<br>Percentage | HHS Floor<br>Mud and<br>Bamboo Reed<br>(%) |
|-------------|-----------------------------------------------------------------------------------|-----------------------------------------------------------|------------------------------------------------------|--------------------------------------------|
| Correlation | HHS Members with<br>Migrant Percentage                                            | .296                                                      | .279                                                 | .378                                       |
|             | HHS Members with<br>Disability percentage                                         | .448                                                      | .206                                                 | .120                                       |
|             | Over Crowed > 2.5<br>Person per room<br>Percentage                                | .576                                                      | .491                                                 | .179                                       |
|             | % of HHS members with<br>Educational Status<br>Illiterate summarized by<br>Kebele | .226                                                      | .633                                                 | .692                                       |
|             | No toilet and Pit latrine<br>Shared Percentage                                    | .064                                                      | .651                                                 | .748                                       |
|             | No Kitchen Percentage                                                             | .438                                                      | -.106                                                | -.304                                      |
|             | Housing Age 20 years or<br>more Percent                                           | .885                                                      | -.142                                                | -.350                                      |
|             | Tenure Not Owner<br>Occupied Percentage                                           | .704                                                      | -.212                                                | -.495                                      |
|             | No Ceiling Percentage                                                             | -.518                                                     | .530                                                 | .792                                       |
|             | Dep_Elecgas                                                                       | -.249                                                     | .736                                                 | .899                                       |
|             | HHS with household<br>facilities deprivation<br>(Radio, TV, House<br>Phone)%      | -.296                                                     | .652                                                 | .893                                       |
|             | Density (2007 Population<br>census /area Ha)                                      | .698                                                      | .153                                                 | -.260                                      |



**Correlation Matrix<sup>a</sup>**

|             |                                                                                   | HHS Wood<br>Mud with<br>Thatch/Wood/<br>Stone(%) | Unemployment<br>Rate 10_64<br>age | No Bath<br>Percentage |
|-------------|-----------------------------------------------------------------------------------|--------------------------------------------------|-----------------------------------|-----------------------|
| Correlation | HHS Members with<br>Migrant Percentage                                            | .328                                             | -.131                             | -.298                 |
|             | HHS Members with<br>Disability percentage                                         | .389                                             | .284                              | -.265                 |
|             | Over Crowded > 2.5<br>Person per room<br>Percentage                               | .639                                             | .550                              | -.365                 |
|             | % of HHS members with<br>Educational Status<br>Illiterate summarized by<br>Kebele | .528                                             | -.036                             | -.243                 |
|             | No toilet and Pit latrine<br>Shared Percentage                                    | .669                                             | .048                              | -.136                 |
|             | No Kitchen Percentage                                                             | .157                                             | .298                              | -.250                 |
|             | Housing Age 20 years or<br>more Percent                                           | .478                                             | .528                              | -.577                 |
|             | Tenure Not Owner<br>Occupied Percentage                                           | .298                                             | .568                              | -.445                 |
|             | No Ceiling Percentage                                                             | .102                                             | -.462                             | .267                  |
|             | Dep_Elecgas                                                                       | .456                                             | -.149                             | .086                  |
|             | HHS with household<br>facilities deprivation<br>(Radio, TV, House<br>Phone)%      | .381                                             | -.274                             | .095                  |
|             | Density (2007 Population<br>census /area Ha)                                      | .314                                             | .583                              | -.307                 |

**Correlation Matrix<sup>a</sup>**

|             |                                                                                   | Kerosine,<br>Candle, Fuel<br>Wood and<br>Lamp<br>Percentage | Young<br>Dependency<br>Ratio |
|-------------|-----------------------------------------------------------------------------------|-------------------------------------------------------------|------------------------------|
| Correlation | HHS Members with<br>Migrant Percentage                                            | .771                                                        | .392                         |
|             | HHS Members with<br>Disability percentage                                         | -.120                                                       | -.152                        |
|             | Over Crowed > 2.5<br>Person per room<br>Percentage                                | -.127                                                       | -.197                        |
|             | % of HHS members with<br>Educational Status<br>Illiterate summarized by<br>Kebele | .738                                                        | .546                         |
|             | No toilet and Pit latrine<br>Shared Percentage                                    | .450                                                        | .461                         |
|             | No Kitchen Percentage                                                             | .029                                                        | -.268                        |
|             | Housing Age 20 years or<br>more Percent                                           | -.309                                                       | -.711                        |
|             | Tenure Not Owner<br>Occupied Percentage                                           | -.658                                                       | -.852                        |
|             | No Ceiling Percentage                                                             | .696                                                        | .897                         |
|             | Dep_Elecgas                                                                       | .421                                                        | .659                         |
|             | HHS with household<br>facilities deprivation<br>(Radio, TV, House<br>Phone)%      | .700                                                        | .816                         |
|             | Density (2007 Population<br>census /area Ha)                                      | -.247                                                       | -.450                        |

Correlation Matrix<sup>a</sup>

|                 |                                                                                   | HHS<br>Members with<br>Migrant<br>Percentage | HHS<br>Members with<br>Disability<br>percentage | Over Crowed<br>> 2.5 Person<br>per room<br>Percentage |
|-----------------|-----------------------------------------------------------------------------------|----------------------------------------------|-------------------------------------------------|-------------------------------------------------------|
| Sig. (1-tailed) | Water not Private or<br>House connection percent                                  | .273                                         | .038                                            | .262                                                  |
|                 | Waste disposal percent<br>not in Public and Private                               | .295                                         | -.057                                           | -.162                                                 |
|                 | Old Dependency Ratio                                                              | .587                                         | .350                                            | .305                                                  |
|                 | % of FHH with marital<br>status widowed or<br>divorced                            | .296                                         | .448                                            | .576                                                  |
|                 | Percent HHS not Degree<br>and Above Percentage                                    | .279                                         | .206                                            | .491                                                  |
|                 | HHS Floor Mud and<br>Bamboo Reed(%)                                               | .378                                         | .120                                            | .179                                                  |
|                 | HHS Wood Mud with<br>Thatch/Wood/Stone(%)                                         | .328                                         | .389                                            | .639                                                  |
|                 | Unemployment Rate<br>10_64 age                                                    | -.131                                        | .284                                            | .550                                                  |
|                 | No Bath Percentage                                                                | -.298                                        | -.265                                           | -.365                                                 |
|                 | Kerosine, Candle, Fuel<br>Wood and Lamp<br>Percentage                             | .771                                         | -.120                                           | -.127                                                 |
|                 | Young Dependency Ratio                                                            | .392                                         | -.152                                           | -.197                                                 |
|                 | HHS Members with<br>Migrant Percentage                                            |                                              | .422                                            | .330                                                  |
|                 | HHS Members with<br>Disability percentage                                         | .422                                         |                                                 | .000                                                  |
|                 | Over Crowed > 2.5<br>Person per room<br>Percentage                                | .330                                         | .000                                            |                                                       |
|                 | % of HHS members with<br>Educational Status<br>Illiterate summarized by<br>Kebele | .000                                         | .001                                            | .000                                                  |
|                 | No toilet and Pit latrine<br>Shared Percentage                                    | .000                                         | .020                                            | .000                                                  |
|                 | No Kitchen Percentage                                                             | .157                                         | .085                                            | .000                                                  |
|                 | Housing Age 20 years or<br>more Percent                                           | .089                                         | .000                                            | .000                                                  |

Correlation Matrix<sup>a</sup>

|                 |                                                                          | % of HHS members with Educational Status Illiterate summarized by Kebele | No toilet and Pit latrine Shared Percentage | No Kitchen Percentage |
|-----------------|--------------------------------------------------------------------------|--------------------------------------------------------------------------|---------------------------------------------|-----------------------|
| Sig. (1-tailed) | Water not Private or House connection percent                            | .532                                                                     | .771                                        | .090                  |
|                 | Waste disposal percent not in Public and Private                         | .528                                                                     | .515                                        | -.250                 |
|                 | Old Dependency Ratio                                                     | .393                                                                     | .219                                        | .250                  |
|                 | % of FHH with marital status widowed or divorced                         | .226                                                                     | .064                                        | .438                  |
|                 | Percent HHS not Degree and Above Percentage                              | .633                                                                     | .651                                        | -.106                 |
|                 | HHS Floor Mud and Bamboo Reed(%)                                         | .692                                                                     | .748                                        | -.304                 |
|                 | HHS Wood Mud with Thatch/Wood/Stone(%)                                   | .528                                                                     | .669                                        | .157                  |
|                 | Unemployment Rate 10_64 age                                              | -.036                                                                    | .048                                        | .298                  |
|                 | No Bath Percentage                                                       | -.243                                                                    | -.136                                       | -.250                 |
|                 | Kerosine, Candle, Fuel Wood and Lamp Percentage                          | .738                                                                     | .450                                        | .029                  |
|                 | Young Dependency Ratio                                                   | .546                                                                     | .461                                        | -.268                 |
|                 | HHS Members with Migrant Percentage                                      | .000                                                                     | .000                                        | .157                  |
|                 | HHS Members with Disability percentage                                   | .001                                                                     | .020                                        | .085                  |
|                 | Over Crowded > 2.5 Person per room Percentage                            | .000                                                                     | .000                                        | .000                  |
|                 | % of HHS members with Educational Status Illiterate summarized by Kebele |                                                                          | .000                                        | .066                  |
|                 | No toilet and Pit latrine Shared Percentage                              | .000                                                                     |                                             | .491                  |
|                 | No Kitchen Percentage                                                    | .066                                                                     | .491                                        |                       |
|                 | Housing Age 20 years or more Percent                                     | .302                                                                     | .466                                        | .000                  |

Correlation Matrix<sup>a</sup>

|                 |                                                                                   | Housing Age<br>20 years or<br>more Percent | Tenure Not<br>Owner<br>Occupied<br>Percentage | No Ceiling<br>Percentage |
|-----------------|-----------------------------------------------------------------------------------|--------------------------------------------|-----------------------------------------------|--------------------------|
| Sig. (1-tailed) | Water not Private or<br>House connection percent                                  | -.137                                      | -.260                                         | .596                     |
|                 | Waste disposal percent<br>not in Public and Private                               | -.658                                      | -.762                                         | .911                     |
|                 | Old Dependency Ratio                                                              | .723                                       | .369                                          | -.272                    |
|                 | % of FHH with marital<br>status widowed or<br>divorced                            | .885                                       | .704                                          | -.518                    |
|                 | Percent HHS not Degree<br>and Above Percentage                                    | -.142                                      | -.212                                         | .530                     |
|                 | HHS Floor Mud and<br>Bamboo Reed(%)                                               | -.350                                      | -.495                                         | .792                     |
|                 | HHS Wood Mud with<br>Thatch/Wood/Stone(%)                                         | .478                                       | .298                                          | .102                     |
|                 | Unemployment Rate<br>10_64 age                                                    | .528                                       | .568                                          | -.462                    |
|                 | No Bath Percentage                                                                | -.577                                      | -.445                                         | .267                     |
|                 | Kerosine, Candle, Fuel<br>Wood and Lamp<br>Percentage                             | -.309                                      | -.658                                         | .696                     |
|                 | Young Dependency Ratio                                                            | -.711                                      | -.852                                         | .897                     |
|                 | HHS Members with<br>Migrant Percentage                                            | .089                                       | .001                                          | .000                     |
|                 | HHS Members with<br>Disability percentage                                         | .000                                       | .000                                          | .451                     |
|                 | Over Crowded > 2.5<br>Person per room<br>Percentage                               | .000                                       | .000                                          | .037                     |
|                 | % of HHS members with<br>Educational Status<br>Illiterate summarized by<br>Kebele | .302                                       | .002                                          | .000                     |
|                 | No toilet and Pit latrine<br>Shared Percentage                                    | .466                                       | .052                                          | .000                     |
|                 | No Kitchen Percentage                                                             | .000                                       | .000                                          | .011                     |
|                 | Housing Age 20 years or<br>more Percent                                           |                                            | .000                                          | .000                     |

Correlation Matrix<sup>a</sup>

|                 |                                                                          |             | HHS with household facilities deprivation (Radio, TV, House Phone)% | Density (2007 Population census /area Ha) |
|-----------------|--------------------------------------------------------------------------|-------------|---------------------------------------------------------------------|-------------------------------------------|
|                 |                                                                          | Dep_Elecgas |                                                                     |                                           |
| Sig. (1-tailed) | Water not Private or House connection percent                            | .665        | .764                                                                | -.152                                     |
|                 | Waste disposal percent not in Public and Private                         | .676        | .834                                                                | -.468                                     |
|                 | Old Dependency Ratio                                                     | -.104       | -.053                                                               | .403                                      |
|                 | % of FHH with marital status widowed or divorced                         | -.249       | -.296                                                               | .698                                      |
|                 | Percent HHS not Degree and Above Percentage                              | .736        | .652                                                                | .153                                      |
|                 | HHS Floor Mud and Bamboo Reed(%)                                         | .899        | .893                                                                | -.260                                     |
|                 | HHS Wood Mud with Thatch/Wood/Stone(%)                                   | .456        | .381                                                                | .314                                      |
|                 | Unemployment Rate 10_64 age                                              | -.149       | -.274                                                               | .583                                      |
|                 | No Bath Percentage                                                       | .086        | .095                                                                | -.307                                     |
|                 | Kerosine, Candle, Fuel Wood and Lamp Percentage                          | .421        | .700                                                                | -.247                                     |
|                 | Young Dependency Ratio                                                   | .659        | .816                                                                | -.450                                     |
|                 | HHS Members with Migrant Percentage                                      | .002        | .000                                                                | .457                                      |
|                 | HHS Members with Disability percentage                                   | .294        | .381                                                                | .000                                      |
|                 | Over Crowed > 2.5 Person per room Percentage                             | .017        | .226                                                                | .000                                      |
|                 | % of HHS members with Educational Status Illiterate summarized by Kebele | .000        | .000                                                                | .022                                      |
|                 | No toilet and Pit latrine Shared Percentage                              | .000        | .000                                                                | .444                                      |
|                 | No Kitchen Percentage                                                    | .000        | .062                                                                | .000                                      |
|                 | Housing Age 20 years or more Percent                                     | .000        | .000                                                                | .000                                      |

Correlation Matrix<sup>a</sup>

|                 |                                                                                   | Water not<br>Private or<br>House<br>connection<br>percent | Waste<br>disposal<br>percent not in<br>Public and<br>Private | Old<br>Dependency<br>Ratio |
|-----------------|-----------------------------------------------------------------------------------|-----------------------------------------------------------|--------------------------------------------------------------|----------------------------|
|                 | Water not Private or<br>House connection percent                                  | 1.000                                                     | .584                                                         | .011                       |
|                 | Waste disposal percent<br>not in Public and Private                               | .584                                                      | 1.000                                                        | -.286                      |
|                 | Old Dependency Ratio                                                              | .011                                                      | -.286                                                        | 1.000                      |
|                 | % of FHH with marital<br>status widowed or<br>divorced                            | -.081                                                     | -.512                                                        | .765                       |
|                 | Percent HHS not Degree<br>and Above Percentage                                    | .594                                                      | .510                                                         | -.009                      |
|                 | HHS Floor Mud and<br>Bamboo Reed(%)                                               | .694                                                      | .769                                                         | -.016                      |
|                 | HHS Wood Mud with<br>Thatch/Wood/Stone(%)                                         | .590                                                      | .148                                                         | .532                       |
|                 | Unemployment Rate<br>10_64 age                                                    | -.062                                                     | -.347                                                        | .271                       |
|                 | No Bath Percentage                                                                | .011                                                      | .307                                                         | -.606                      |
|                 | Kerosine, Candle, Fuel<br>Wood and Lamp<br>Percentage                             | .446                                                      | .620                                                         | .166                       |
|                 | Young Dependency Ratio                                                            | .520                                                      | .859                                                         | -.292                      |
| Sig. (1-tailed) | HHS Members with<br>Migrant Percentage                                            | .003                                                      | .002                                                         | .000                       |
|                 | HHS Members with<br>Disability percentage                                         | .356                                                      | .289                                                         | .000                       |
|                 | Over Crowded > 2.5<br>Person per room<br>Percentage                               | .004                                                      | .054                                                         | .001                       |
|                 | % of HHS members with<br>Educational Status<br>Illiterate summarized by<br>Kebele | .000                                                      | .000                                                         | .000                       |
|                 | No toilet and Pit latrine<br>Shared Percentage                                    | .000                                                      | .000                                                         | .015                       |
|                 | No Kitchen Percentage                                                             | .188                                                      | .006                                                         | .006                       |
|                 | Housing Age 20 years or<br>more Percent                                           | .088                                                      | .000                                                         | .000                       |

Correlation Matrix<sup>a</sup>

|                 |                                                                                   | % of FHH with<br>marital status<br>widowed or<br>divorced | Percent HHS<br>not Degree<br>and Above<br>Percentage | HHS Floor<br>Mud and<br>Bamboo Reed<br>(%) |
|-----------------|-----------------------------------------------------------------------------------|-----------------------------------------------------------|------------------------------------------------------|--------------------------------------------|
| Sig. (1-tailed) | Water not Private or<br>House connection percent                                  | -.081                                                     | .594                                                 | .694                                       |
|                 | Waste disposal percent<br>not in Public and Private                               | -.512                                                     | .510                                                 | .769                                       |
|                 | Old Dependency Ratio                                                              | .765                                                      | -.009                                                | -.016                                      |
|                 | % of FHH with marital<br>status widowed or<br>divorced                            | 1.000                                                     | .038                                                 | -.226                                      |
|                 | Percent HHS not Degree<br>and Above Percentage                                    | .038                                                      | 1.000                                                | .720                                       |
|                 | HHS Floor Mud and<br>Bamboo Reed(%)                                               | -.226                                                     | .720                                                 | 1.000                                      |
|                 | HHS Wood Mud with<br>Thatch/Wood/Stone(%)                                         | .530                                                      | .533                                                 | .496                                       |
|                 | Unemployment Rate<br>10_64 age                                                    | .583                                                      | .136                                                 | -.209                                      |
|                 | No Bath Percentage                                                                | -.536                                                     | .013                                                 | .026                                       |
|                 | Kerosine, Candle, Fuel<br>Wood and Lamp<br>Percentage                             | -.145                                                     | .320                                                 | .504                                       |
|                 | Young Dependency Ratio                                                            | -.562                                                     | .544                                                 | .740                                       |
|                 | HHS Members with<br>Migrant Percentage                                            | .001                                                      | .003                                                 | .000                                       |
|                 | HHS Members with<br>Disability percentage                                         | .000                                                      | .020                                                 | .118                                       |
|                 | Over Crowded > 2.5<br>Person per room<br>Percentage                               | .000                                                      | .000                                                 | .038                                       |
|                 | % of HHS members with<br>Educational Status<br>Illiterate summarized by<br>Kebele | .012                                                      | .000                                                 | .000                                       |
|                 | No toilet and Pit latrine<br>Shared Percentage                                    | .263                                                      | .000                                                 | .000                                       |
|                 | No Kitchen Percentage                                                             | .000                                                      | .149                                                 | .001                                       |
|                 | Housing Age 20 years or<br>more Percent                                           | .000                                                      | .081                                                 | .000                                       |



Correlation Matrix<sup>a</sup>

|                 |                                                                                   | HHS Wood<br>Mud with<br>Thatch/Wood/<br>Stone(%) | Unemployment<br>Rate 10_64<br>age | No Bath<br>Percentage |
|-----------------|-----------------------------------------------------------------------------------|--------------------------------------------------|-----------------------------------|-----------------------|
| Sig. (1-tailed) | Water not Private or<br>House connection percent                                  | .590                                             | -.062                             | .011                  |
|                 | Waste disposal percent<br>not in Public and Private                               | .148                                             | -.347                             | .307                  |
|                 | Old Dependency Ratio                                                              | .532                                             | .271                              | -.606                 |
|                 | % of FHH with marital<br>status widowed or<br>divorced                            | .530                                             | .583                              | -.536                 |
|                 | Percent HHS not Degree<br>and Above Percentage                                    | .533                                             | .136                              | .013                  |
|                 | HHS Floor Mud and<br>Bamboo Reed(%)                                               | .496                                             | -.209                             | .026                  |
|                 | HHS Wood Mud with<br>Thatch/Wood/Stone(%)                                         | 1.000                                            | .393                              | -.328                 |
|                 | Unemployment Rate<br>10_64 age                                                    | .393                                             | 1.000                             | -.123                 |
|                 | No Bath Percentage                                                                | -.328                                            | -.123                             | 1.000                 |
|                 | Kerosine, Candle, Fuel<br>Wood and Lamp<br>Percentage                             | .109                                             | -.394                             | -.025                 |
|                 | Young Dependency Ratio                                                            | .025                                             | -.429                             | .301                  |
|                 | HHS Members with<br>Migrant Percentage                                            | .000                                             | .099                              | .001                  |
|                 | HHS Members with<br>Disability percentage                                         | .000                                             | .002                              | .004                  |
|                 | Over Crowded > 2.5<br>Person per room<br>Percentage                               | .000                                             | .000                              | .000                  |
|                 | % of HHS members with<br>Educational Status<br>Illiterate summarized by<br>Kebele | .000                                             | .362                              | .008                  |
|                 | No toilet and Pit latrine<br>Shared Percentage                                    | .000                                             | .319                              | .090                  |
|                 | No Kitchen Percentage                                                             | .060                                             | .001                              | .006                  |
|                 | Housing Age 20 years or<br>more Percent                                           | .000                                             | .000                              | .000                  |

Correlation Matrix<sup>a</sup>

|                 |                                                                                   | Kerosine,<br>Candle, Fuel<br>Wood and<br>Lamp<br>Percentage | Young<br>Dependency<br>Ratio |
|-----------------|-----------------------------------------------------------------------------------|-------------------------------------------------------------|------------------------------|
| Sig. (1-tailed) | Water not Private or<br>House connection percent                                  | .446                                                        | .520                         |
|                 | Waste disposal percent<br>not in Public and Private                               | .620                                                        | .859                         |
|                 | Old Dependency Ratio                                                              | .166                                                        | -.292                        |
|                 | % of FHH with marital<br>status widowed or<br>divorced                            | -.145                                                       | -.562                        |
|                 | Percent HHS not Degree<br>and Above Percentage                                    | .320                                                        | .544                         |
|                 | HHS Floor Mud and<br>Bamboo Reed(%)                                               | .504                                                        | .740                         |
|                 | HHS Wood Mud with<br>Thatch/Wood/Stone(%)                                         | .109                                                        | .025                         |
|                 | Unemployment Rate<br>10_64 age                                                    | -.394                                                       | -.429                        |
|                 | No Bath Percentage                                                                | -.025                                                       | .301                         |
|                 | Kerosine, Candle, Fuel<br>Wood and Lamp<br>Percentage                             | 1.000                                                       | .718                         |
|                 | Young Dependency Ratio                                                            | .718                                                        | 1.000                        |
|                 | HHS Members with<br>Migrant Percentage                                            | .000                                                        | .000                         |
|                 | HHS Members with<br>Disability percentage                                         | .119                                                        | .067                         |
|                 | Over Crowded > 2.5<br>Person per room<br>Percentage                               | .105                                                        | .025                         |
|                 | % of HHS members with<br>Educational Status<br>Illiterate summarized by<br>Kebele | .000                                                        | .000                         |
|                 | No toilet and Pit latrine<br>Shared Percentage                                    | .000                                                        | .000                         |
|                 | No Kitchen Percentage                                                             | .389                                                        | .004                         |
|                 | Housing Age 20 years or<br>more Percent                                           | .001                                                        | .000                         |

Correlation Matrix<sup>a</sup>

|                                                                              | HHS<br>Members with<br>Migrant<br>Percentage | HHS<br>Members with<br>Disability<br>percentage | Over Crowed<br>> 2.5 Person<br>per room<br>Percentage |
|------------------------------------------------------------------------------|----------------------------------------------|-------------------------------------------------|-------------------------------------------------------|
| Tenure Not Owner<br>Occupied Percentage                                      | .001                                         | .000                                            | .000                                                  |
| No Ceiling Percentage                                                        | .000                                         | .451                                            | .037                                                  |
| Dep_Elecgas                                                                  | .002                                         | .294                                            | .017                                                  |
| HHS with household<br>facilities deprivation<br>(Radio, TV, House<br>Phone)% | .000                                         | .381                                            | .226                                                  |
| Density (2007 Population<br>census /area Ha)                                 | .457                                         | .000                                            | .000                                                  |
| Water not Private or<br>House connection percent                             | .003                                         | .356                                            | .004                                                  |
| Waste disposal percent<br>not in Public and Private                          | .002                                         | .289                                            | .054                                                  |
| Old Dependency Ratio                                                         | .000                                         | .000                                            | .001                                                  |
| % of FHH with marital<br>status widowed or<br>divorced                       | .001                                         | .000                                            | .000                                                  |
| Percent HHS not Degree<br>and Above Percentage                               | .003                                         | .020                                            | .000                                                  |
| HHS Floor Mud and<br>Bamboo Reed(%)                                          | .000                                         | .118                                            | .038                                                  |
| HHS Wood Mud with<br>Thatch/Wood/Stone(%)                                    | .000                                         | .000                                            | .000                                                  |
| Unemployment Rate<br>10_64 age                                               | .099                                         | .002                                            | .000                                                  |
| No Bath Percentage                                                           | .001                                         | .004                                            | .000                                                  |
| Kerosine, Candle, Fuel<br>Wood and Lamp<br>Percentage                        | .000                                         | .119                                            | .105                                                  |
| Young Dependency Ratio                                                       | .000                                         | .067                                            | .025                                                  |

**Correlation Matrix<sup>a</sup>**

|                                                                     | % of HHS members with Educational Status Illiterate summarized by Kebele | No toilet and Pit latrine Shared Percentage | No Kitchen Percentage |
|---------------------------------------------------------------------|--------------------------------------------------------------------------|---------------------------------------------|-----------------------|
| Tenure Not Owner Occupied Percentage                                | .002                                                                     | .052                                        | .000                  |
| No Ceiling Percentage                                               | .000                                                                     | .000                                        | .011                  |
| Dep_Elecgas                                                         | .000                                                                     | .000                                        | .000                  |
| HHS with household facilities deprivation (Radio, TV, House Phone)% | .000                                                                     | .000                                        | .062                  |
| Density (2007 Population census /area Ha)                           | .022                                                                     | .444                                        | .000                  |
| Water not Private or House connection percent                       | .000                                                                     | .000                                        | .188                  |
| Waste disposal percent not in Public and Private                    | .000                                                                     | .000                                        | .006                  |
| Old Dependency Ratio                                                | .000                                                                     | .015                                        | .006                  |
| % of FHH with marital status widowed or divorced                    | .012                                                                     | .263                                        | .000                  |
| Percent HHS not Degree and Above Percentage                         | .000                                                                     | .000                                        | .149                  |
| HHS Floor Mud and Bamboo Reed(%)                                    | .000                                                                     | .000                                        | .001                  |
| HHS Wood Mud with Thatch/Wood/Stone(%)                              | .000                                                                     | .000                                        | .060                  |
| Unemployment Rate 10_64 age                                         | .362                                                                     | .319                                        | .001                  |
| No Bath Percentage                                                  | .008                                                                     | .090                                        | .006                  |
| Kerosine, Candle, Fuel Wood and Lamp Percentage                     | .000                                                                     | .000                                        | .389                  |
| Young Dependency Ratio                                              | .000                                                                     | .000                                        | .004                  |

Correlation Matrix<sup>a</sup>

|                                                                              | Housing Age<br>20 years or<br>more Percent | Tenure Not<br>Owner<br>Occupied<br>Percentage | No Ceiling<br>Percentage |
|------------------------------------------------------------------------------|--------------------------------------------|-----------------------------------------------|--------------------------|
| Tenure Not Owner<br>Occupied Percentage                                      | .000                                       |                                               | .000                     |
| No Ceiling Percentage                                                        | .000                                       | .000                                          |                          |
| Dep_Elecgas                                                                  | .000                                       | .000                                          | .000                     |
| HHS with household<br>facilities deprivation<br>(Radio, TV, House<br>Phone)% | .000                                       | .000                                          | .000                     |
| Density (2007 Population<br>census /area Ha)                                 | .000                                       | .000                                          | .000                     |
| Water not Private or<br>House connection percent                             | .088                                       | .005                                          | .000                     |
| Waste disposal percent<br>not in Public and Private                          | .000                                       | .000                                          | .000                     |
| Old Dependency Ratio                                                         | .000                                       | .000                                          | .003                     |
| % of FHH with marital<br>status widowed or<br>divorced                       | .000                                       | .000                                          | .000                     |
| Percent HHS not Degree<br>and Above Percentage                               | .081                                       | .018                                          | .000                     |
| HHS Floor Mud and<br>Bamboo Reed(%)                                          | .000                                       | .000                                          | .000                     |
| HHS Wood Mud with<br>Thatch/Wood/Stone(%)                                    | .000                                       | .001                                          | .158                     |
| Unemployment Rate<br>10_64 age                                               | .000                                       | .000                                          | .000                     |
| No Bath Percentage                                                           | .000                                       | .000                                          | .004                     |
| Kerosine, Candle, Fuel<br>Wood and Lamp<br>Percentage                        | .001                                       | .000                                          | .000                     |
| Young Dependency Ratio                                                       | .000                                       | .000                                          | .000                     |

Correlation Matrix<sup>a</sup>

|                                                                     | Dep_Elecgas | HHS with household facilities deprivation (Radio, TV, House Phone)% | Density (2007 Population census /area Ha) |
|---------------------------------------------------------------------|-------------|---------------------------------------------------------------------|-------------------------------------------|
| Tenure Not Owner Occupied Percentage                                | .000        | .000                                                                | .000                                      |
| No Ceiling Percentage                                               | .000        | .000                                                                | .000                                      |
| Dep_Elecgas                                                         |             | .000                                                                | .022                                      |
| HHS with household facilities deprivation (Radio, TV, House Phone)% | .000        |                                                                     | .001                                      |
| Density (2007 Population census /area Ha)                           | .022        | .001                                                                |                                           |
| Water not Private or House connection percent                       | .000        | .000                                                                | .066                                      |
| Waste disposal percent not in Public and Private                    | .000        | .000                                                                | .000                                      |
| Old Dependency Ratio                                                | .152        | .302                                                                | .000                                      |
| % of FHH with marital status widowed or divorced                    | .006        | .001                                                                | .000                                      |
| Percent HHS not Degree and Above Percentage                         | .000        | .000                                                                | .065                                      |
| HHS Floor Mud and Bamboo Reed(%)                                    | .000        | .000                                                                | .005                                      |
| HHS Wood Mud with Thatch/Wood/Stone(%)                              | .000        | .000                                                                | .001                                      |
| Unemployment Rate 10_64 age                                         | .070        | .003                                                                | .000                                      |
| No Bath Percentage                                                  | .198        | .176                                                                | .001                                      |
| Kerosine, Candle, Fuel Wood and Lamp Percentage                     | .000        | .000                                                                | .007                                      |
| Young Dependency Ratio                                              | .000        | .000                                                                | .000                                      |

Correlation Matrix<sup>a</sup>

|                                                                              | Water not<br>Private or<br>House<br>connection<br>percent | Waste<br>disposal<br>percent not in<br>Public and<br>Private | Old<br>Dependency<br>Ratio |
|------------------------------------------------------------------------------|-----------------------------------------------------------|--------------------------------------------------------------|----------------------------|
| Tenure Not Owner<br>Occupied Percentage                                      | .005                                                      | .000                                                         | .000                       |
| No Ceiling Percentage                                                        | .000                                                      | .000                                                         | .003                       |
| Dep_Elecgas                                                                  | .000                                                      | .000                                                         | .152                       |
| HHS with household<br>facilities deprivation<br>(Radio, TV, House<br>Phone)% | .000                                                      | .000                                                         | .302                       |
| Density (2007 Population<br>census /area Ha)                                 | .066                                                      | .000                                                         | .000                       |
| Water not Private or<br>House connection percent                             |                                                           | .000                                                         | .456                       |
| Waste disposal percent<br>not in Public and Private                          | .000                                                      |                                                              | .002                       |
| Old Dependency Ratio                                                         | .456                                                      | .002                                                         |                            |
| % of FHH with marital<br>status widowed or<br>divorced                       | .213                                                      | .000                                                         | .000                       |
| Percent HHS not Degree<br>and Above Percentage                               | .000                                                      | .000                                                         | .465                       |
| HHS Floor Mud and<br>Bamboo Reed(%)                                          | .000                                                      | .000                                                         | .437                       |
| HHS Wood Mud with<br>Thatch/Wood/Stone(%)                                    | .000                                                      | .072                                                         | .000                       |
| Unemployment Rate<br>10_64 age                                               | .271                                                      | .000                                                         | .003                       |
| No Bath Percentage                                                           | .457                                                      | .001                                                         | .000                       |
| Kerosine, Candle, Fuel<br>Wood and Lamp<br>Percentage                        | .000                                                      | .000                                                         | .051                       |
| Young Dependency Ratio                                                       | .000                                                      | .000                                                         | .002                       |

Correlation Matrix<sup>a</sup>

|                                                                              | % of FHH with<br>marital status<br>widowed or<br>divorced | Percent HHS<br>not Degree<br>and Above<br>Percentage | HHS Floor<br>Mud and<br>Bamboo Reed<br>(%) |
|------------------------------------------------------------------------------|-----------------------------------------------------------|------------------------------------------------------|--------------------------------------------|
| Tenure Not Owner<br>Occupied Percentage                                      | .000                                                      | .018                                                 | .000                                       |
| No Ceiling Percentage                                                        | .000                                                      | .000                                                 | .000                                       |
| Dep_Elecgas                                                                  | .006                                                      | .000                                                 | .000                                       |
| HHS with household<br>facilities deprivation<br>(Radio, TV, House<br>Phone)% | .001                                                      | .000                                                 | .000                                       |
| Density (2007 Population<br>census /area Ha)                                 | .000                                                      | .065                                                 | .005                                       |
| Water not Private or<br>House connection percent                             | .213                                                      | .000                                                 | .000                                       |
| Waste disposal percent<br>not in Public and Private                          | .000                                                      | .000                                                 | .000                                       |
| Old Dependency Ratio                                                         | .000                                                      | .465                                                 | .437                                       |
| % of FHH with marital<br>status widowed or<br>divorced                       |                                                           | .356                                                 | .012                                       |
| Percent HHS not Degree<br>and Above Percentage                               | .356                                                      |                                                      | .000                                       |
| HHS Floor Mud and<br>Bamboo Reed(%)                                          | .012                                                      | .000                                                 |                                            |
| HHS Wood Mud with<br>Thatch/Wood/Stone(%)                                    | .000                                                      | .000                                                 | .000                                       |
| Unemployment Rate<br>10_64 age                                               | .000                                                      | .090                                                 | .019                                       |
| No Bath Percentage                                                           | .000                                                      | .450                                                 | .401                                       |
| Kerosine, Candle, Fuel<br>Wood and Lamp<br>Percentage                        | .077                                                      | .001                                                 | .000                                       |
| Young Dependency Ratio                                                       | .000                                                      | .000                                                 | .000                                       |



Correlation Matrix<sup>a</sup>

|                                                                              | HHS Wood<br>Mud with<br>Thatch/Wood/<br>Stone(%) | Unemployment<br>Rate 10_64<br>age | No Bath<br>Percentage |
|------------------------------------------------------------------------------|--------------------------------------------------|-----------------------------------|-----------------------|
| Tenure Not Owner<br>Occupied Percentage                                      | .001                                             | .000                              | .000                  |
| No Ceiling Percentage                                                        | .158                                             | .000                              | .004                  |
| Dep_Elecgas                                                                  | .000                                             | .070                              | .198                  |
| HHS with household<br>facilities deprivation<br>(Radio, TV, House<br>Phone)% | .000                                             | .003                              | .176                  |
| Density (2007 Population<br>census /area Ha)                                 | .001                                             | .000                              | .001                  |
| Water not Private or<br>House connection percent                             | .000                                             | .271                              | .457                  |
| Waste disposal percent<br>not in Public and Private                          | .072                                             | .000                              | .001                  |
| Old Dependency Ratio                                                         | .000                                             | .003                              | .000                  |
| % of FHH with marital<br>status widowed or<br>divorced                       | .000                                             | .000                              | .000                  |
| Percent HHS not Degree<br>and Above Percentage                               | .000                                             | .090                              | .450                  |
| HHS Floor Mud and<br>Bamboo Reed(%)                                          | .000                                             | .019                              | .401                  |
| HHS Wood Mud with<br>Thatch/Wood/Stone(%)                                    |                                                  | .000                              | .000                  |
| Unemployment Rate<br>10_64 age                                               | .000                                             |                                   | .112                  |
| No Bath Percentage                                                           | .000                                             | .112                              |                       |
| Kerosine, Candle, Fuel<br>Wood and Lamp<br>Percentage                        | .142                                             | .000                              | .404                  |
| Young Dependency Ratio                                                       | .403                                             | .000                              | .001                  |

Correlation Matrix<sup>a</sup>

|                                                                              | Kerosine,<br>Candle, Fuel<br>Wood and<br>Lamp<br>Percentage | Young<br>Dependency<br>Ratio |
|------------------------------------------------------------------------------|-------------------------------------------------------------|------------------------------|
| Tenure Not Owner<br>Occupied Percentage                                      | .000                                                        | .000                         |
| No Ceiling Percentage                                                        | .000                                                        | .000                         |
| Dep_Elecgas                                                                  | .000                                                        | .000                         |
| HHS with household<br>facilities deprivation<br>(Radio, TV, House<br>Phone)% | .000                                                        | .000                         |
| Density (2007 Population<br>census /area Ha)                                 | .007                                                        | .000                         |
| Water not Private or<br>House connection percent                             | .000                                                        | .000                         |
| Waste disposal percent<br>not in Public and Private                          | .000                                                        | .000                         |
| Old Dependency Ratio                                                         | .051                                                        | .002                         |
| % of FHH with marital<br>status widowed or<br>divorced                       | .077                                                        | .000                         |
| Percent HHS not Degree<br>and Above Percentage                               | .001                                                        | .000                         |
| HHS Floor Mud and<br>Bamboo Reed(%)                                          | .000                                                        | .000                         |
| HHS Wood Mud with<br>Thatch/Wood/Stone(%)                                    | .142                                                        | .403                         |
| Unemployment Rate<br>10_64 age                                               | .000                                                        | .000                         |
| No Bath Percentage                                                           | .404                                                        | .001                         |
| Kerosine, Candle, Fuel<br>Wood and Lamp<br>Percentage                        |                                                             | .000                         |
| Young Dependency Ratio                                                       | .000                                                        |                              |

a. Determinant = 5.11E-016

**Inverse of Correlation Matrix**

|                                                                                   | HHS<br>Members with<br>Migrant<br>Percentage | HHS<br>Members with<br>Disability<br>percentage | Over Crowed<br>> 2.5 Person<br>per room<br>Percentage | % of HHS<br>members with<br>Educational<br>Status<br>Illiterate<br>summarized<br>by Kebele |
|-----------------------------------------------------------------------------------|----------------------------------------------|-------------------------------------------------|-------------------------------------------------------|--------------------------------------------------------------------------------------------|
| HHS Members with<br>Migrant Percentage                                            | 8.376                                        | 1.246                                           | .491                                                  | 1.946                                                                                      |
| HHS Members with<br>Disability percentage                                         | 1.246                                        | 2.359                                           | -.092                                                 | -1.734                                                                                     |
| Over Crowed > 2.5<br>Person per room<br>Percentage                                | .491                                         | -.092                                           | 9.549                                                 | -4.497                                                                                     |
| % of HHS members with<br>Educational Status<br>Illiterate summarized by<br>Kebele | 1.946                                        | -1.734                                          | -4.497                                                | 27.574                                                                                     |
| No toilet and Pit latrine<br>Shared Percentage                                    | -1.161                                       | -.407                                           | -.044                                                 | -1.722                                                                                     |
| No Kitchen Percentage                                                             | -.202                                        | .202                                            | -1.071                                                | -1.737                                                                                     |
| Housing Age 20 years or<br>more Percent                                           | -4.486                                       | .812                                            | 1.399                                                 | -12.855                                                                                    |
| Tenure Not Owner<br>Occupied Percentage                                           | 1.320                                        | -1.670                                          | -6.685                                                | 7.625                                                                                      |
| No Ceiling Percentage                                                             | -4.759                                       | -2.609                                          | 2.826                                                 | -12.698                                                                                    |
| Dep_Elecgas                                                                       | -2.709                                       | -.342                                           | -1.123                                                | -4.060                                                                                     |
| HHS with household<br>facilities deprivation<br>(Radio, TV, House<br>Phone)%      | 3.791                                        | 2.023                                           | 2.432                                                 | -2.384                                                                                     |
| Density (2007 Population<br>census /area Ha)                                      | .436                                         | .539                                            | -2.584                                                | -5.714                                                                                     |
| Water not Private or<br>House connection percent                                  | 1.649                                        | .208                                            | -.373                                                 | 5.156                                                                                      |
| Waste disposal percent<br>not in Public and Private                               | .324                                         | -.050                                           | -.098                                                 | -.231                                                                                      |
| Old Dependency Ratio                                                              | -2.804                                       | -1.175                                          | 1.672                                                 | -1.969                                                                                     |
| % of FHH with marital<br>status widowed or<br>divorced                            | -2.800                                       | -1.340                                          | 1.823                                                 | -1.707                                                                                     |
| Percent HHS not Degree<br>and Above Percentage                                    | -.426                                        | .322                                            | -1.536                                                | -.813                                                                                      |

**Inverse of Correlation Matrix**

|                                                                                   | No toilet and<br>Pit latrine<br>Shared<br>Percentage | No Kitchen<br>Percentage | Housing Age<br>20 years or<br>more Percent | Tenure Not<br>Owner<br>Occupied<br>Percentage |
|-----------------------------------------------------------------------------------|------------------------------------------------------|--------------------------|--------------------------------------------|-----------------------------------------------|
| HHS Members with<br>Migrant Percentage                                            | -1.161                                               | -.202                    | -4.486                                     | 1.320                                         |
| HHS Members with<br>Disability percentage                                         | -.407                                                | .202                     | .812                                       | -1.670                                        |
| Over Crowed > 2.5<br>Person per room<br>Percentage                                | -.044                                                | -1.071                   | 1.399                                      | -6.685                                        |
| % of HHS members with<br>Educational Status<br>Illiterate summarized by<br>Kebele | -1.722                                               | -1.737                   | -12.855                                    | 7.625                                         |
| No toilet and Pit latrine<br>Shared Percentage                                    | 5.410                                                | .410                     | 2.085                                      | -1.484                                        |
| No Kitchen Percentage                                                             | .410                                                 | 3.239                    | -2.889                                     | 1.074                                         |
| Housing Age 20 years or<br>more Percent                                           | 2.085                                                | -2.889                   | 34.051                                     | -16.837                                       |
| Tenure Not Owner<br>Occupied Percentage                                           | -1.484                                               | 1.074                    | -16.837                                    | 27.618                                        |
| No Ceiling Percentage                                                             | 2.955                                                | -.913                    | 13.319                                     | -1.922                                        |
| Dep_Elecgas                                                                       | 2.758                                                | 2.186                    | 2.491                                      | 2.656                                         |
| HHS with household<br>facilities deprivation<br>(Radio, TV, House<br>Phone)%      | -3.440                                               | -2.525                   | 7.968                                      | -12.060                                       |
| Density (2007 Population<br>census /area Ha)                                      | -.120                                                | .586                     | 1.004                                      | -.207                                         |
| Water not Private or<br>House connection percent                                  | -1.957                                               | -1.027                   | -4.782                                     | 2.786                                         |
| Waste disposal percent<br>not in Public and Private                               | .373                                                 | .191                     | -.280                                      | 2.392                                         |
| Old Dependency Ratio                                                              | -.274                                                | 1.431                    | -5.728                                     | 5.791                                         |
| % of FHH with marital<br>status widowed or<br>divorced                            | 2.324                                                | -.262                    | -.305                                      | -2.907                                        |
| Percent HHS not Degree<br>and Above Percentage                                    | -.788                                                | .458                     | 1.374                                      | -.216                                         |

**Inverse of Correlation Matrix**

|                                                                                   | No Ceiling<br>Percentage | Dep_Elecgas | HHS with<br>household<br>facilities<br>deprivation<br>(Radio, TV,<br>House<br>Phone)% | Density (2007<br>Population<br>census /area<br>Ha) |
|-----------------------------------------------------------------------------------|--------------------------|-------------|---------------------------------------------------------------------------------------|----------------------------------------------------|
| HHS Members with<br>Migrant Percentage                                            | -4.759                   | -2.709      | 3.791                                                                                 | .436                                               |
| HHS Members with<br>Disability percentage                                         | -2.609                   | -.342       | 2.023                                                                                 | .539                                               |
| Over Crowed > 2.5<br>Person per room<br>Percentage                                | 2.826                    | -1.123      | 2.432                                                                                 | -2.584                                             |
| % of HHS members with<br>Educational Status<br>Illiterate summarized by<br>Kebele | -12.698                  | -4.060      | -2.384                                                                                | -5.714                                             |
| No toilet and Pit latrine<br>Shared Percentage                                    | 2.955                    | 2.758       | -3.440                                                                                | -.120                                              |
| No Kitchen Percentage                                                             | -.913                    | 2.186       | -2.525                                                                                | .586                                               |
| Housing Age 20 years or<br>more Percent                                           | 13.319                   | 2.491       | 7.968                                                                                 | 1.004                                              |
| Tenure Not Owner<br>Occupied Percentage                                           | -1.922                   | 2.656       | -12.060                                                                               | -.207                                              |
| No Ceiling Percentage                                                             | 30.208                   | 6.721       | -11.731                                                                               | 1.987                                              |
| Dep_Elecgas                                                                       | 6.721                    | 12.941      | -11.368                                                                               | .413                                               |
| HHS with household<br>facilities deprivation<br>(Radio, TV, House<br>Phone)%      | -11.731                  | -11.368     | 32.931                                                                                | .099                                               |
| Density (2007 Population<br>census /area Ha)                                      | 1.987                    | .413        | .099                                                                                  | 6.014                                              |
| Water not Private or<br>House connection percent                                  | -2.677                   | -1.026      | -3.624                                                                                | -.268                                              |
| Waste disposal percent<br>not in Public and Private                               | -3.924                   | 1.822       | -1.489                                                                                | .123                                               |
| Old Dependency Ratio                                                              | 3.660                    | 2.940       | -6.979                                                                                | -.260                                              |
| % of FHH with marital<br>status widowed or<br>divorced                            | 1.892                    | 2.114       | -.396                                                                                 | -1.638                                             |
| Percent HHS not Degree<br>and Above Percentage                                    | -1.388                   | -1.826      | 1.916                                                                                 | -.306                                              |

**Inverse of Correlation Matrix**

|                                                                                   | Water not<br>Private or<br>House<br>connection<br>percent | Waste<br>disposal<br>percent not in<br>Public and<br>Private | Old<br>Dependency<br>Ratio | % of FHH with<br>marital status<br>widowed or<br>divorced |
|-----------------------------------------------------------------------------------|-----------------------------------------------------------|--------------------------------------------------------------|----------------------------|-----------------------------------------------------------|
| HHS Members with<br>Migrant Percentage                                            | 1.649                                                     | .324                                                         | -2.804                     | -2.800                                                    |
| HHS Members with<br>Disability percentage                                         | .208                                                      | -.050                                                        | -1.175                     | -1.340                                                    |
| Over Crowed > 2.5<br>Person per room<br>Percentage                                | -.373                                                     | -.098                                                        | 1.672                      | 1.823                                                     |
| % of HHS members with<br>Educational Status<br>Illiterate summarized by<br>Kebele | 5.156                                                     | -.231                                                        | -1.969                     | -1.707                                                    |
| No toilet and Pit latrine<br>Shared Percentage                                    | -1.957                                                    | .373                                                         | -.274                      | 2.324                                                     |
| No Kitchen Percentage                                                             | -1.027                                                    | .191                                                         | 1.431                      | -.262                                                     |
| Housing Age 20 years or<br>more Percent                                           | -4.782                                                    | -.280                                                        | -5.728                     | -.305                                                     |
| Tenure Not Owner<br>Occupied Percentage                                           | 2.786                                                     | 2.392                                                        | 5.791                      | -2.907                                                    |
| No Ceiling Percentage                                                             | -2.677                                                    | -3.924                                                       | 3.660                      | 1.892                                                     |
| Dep_Elecgas                                                                       | -1.026                                                    | 1.822                                                        | 2.940                      | 2.114                                                     |
| HHS with household<br>facilities deprivation<br>(Radio, TV, House<br>Phone)%      | -3.624                                                    | -1.489                                                       | -6.979                     | -.396                                                     |
| Density (2007 Population<br>census /area Ha)                                      | -.268                                                     | .123                                                         | -.260                      | -1.638                                                    |
| Water not Private or<br>House connection percent                                  | 6.219                                                     | .115                                                         | 1.082                      | -.892                                                     |
| Waste disposal percent<br>not in Public and Private                               | .115                                                      | 8.018                                                        | 1.042                      | .730                                                      |
| Old Dependency Ratio                                                              | 1.082                                                     | 1.042                                                        | 9.584                      | -1.354                                                    |
| % of FHH with marital<br>status widowed or<br>divorced                            | -.892                                                     | .730                                                         | -1.354                     | 11.359                                                    |
| Percent HHS not Degree<br>and Above Percentage                                    | -.660                                                     | .208                                                         | .548                       | -2.213                                                    |

**Inverse of Correlation Matrix**

|                                                                                   | Percent HHS<br>not Degree<br>and Above<br>Percentage | HHS Floor<br>Mud and<br>Bamboo Reed<br>(%) | HHS Wood<br>Mud with<br>Thatch/Wood/<br>Stone(%) | Unemployment<br>Rate 10_64<br>age |
|-----------------------------------------------------------------------------------|------------------------------------------------------|--------------------------------------------|--------------------------------------------------|-----------------------------------|
| HHS Members with<br>Migrant Percentage                                            | -.426                                                | -.026                                      | 1.064                                            | -.257                             |
| HHS Members with<br>Disability percentage                                         | .322                                                 | .515                                       | .203                                             | -.081                             |
| Over Crowed > 2.5<br>Person per room<br>Percentage                                | -1.536                                               | -2.146                                     | -1.421                                           | -.789                             |
| % of HHS members with<br>Educational Status<br>Illiterate summarized by<br>Kebele | -.813                                                | -4.506                                     | 2.657                                            | -.229                             |
| No toilet and Pit latrine<br>Shared Percentage                                    | -.788                                                | -2.445                                     | -1.239                                           | -.389                             |
| No Kitchen Percentage                                                             | .458                                                 | 2.686                                      | .152                                             | -.263                             |
| Housing Age 20 years or<br>more Percent                                           | 1.374                                                | -6.542                                     | -3.445                                           | .980                              |
| Tenure Not Owner<br>Occupied Percentage                                           | -.216                                                | 5.302                                      | -1.509                                           | 1.109                             |
| No Ceiling Percentage                                                             | -1.388                                               | -2.548                                     | -2.964                                           | 2.540                             |
| Dep_Elecgas                                                                       | -1.826                                               | -3.778                                     | -2.726                                           | .326                              |
| HHS with household<br>facilities deprivation<br>(Radio, TV, House<br>Phone)%      | 1.916                                                | -5.457                                     | 3.136                                            | -1.779                            |
| Density (2007 Population<br>census /area Ha)                                      | -.306                                                | 3.360                                      | .718                                             | .028                              |
| Water not Private or<br>House connection percent                                  | -.660                                                | 1.000                                      | -1.768                                           | .438                              |
| Waste disposal percent<br>not in Public and Private                               | .208                                                 | -1.533                                     | -1.855                                           | -.869                             |
| Old Dependency Ratio                                                              | .548                                                 | 1.976                                      | -3.069                                           | .402                              |
| % of FHH with marital<br>status widowed or<br>divorced                            | -2.213                                               | -2.360                                     | -1.672                                           | -1.721                            |
| Percent HHS not Degree<br>and Above Percentage                                    | 5.079                                                | .594                                       | -.131                                            | -.233                             |

**Inverse of Correlation Matrix**

|                                                                                   | No Bath<br>Percentage | Kerosine,<br>Candle, Fuel<br>Wood and<br>Lamp<br>Percentage | Young<br>Dependency<br>Ratio |
|-----------------------------------------------------------------------------------|-----------------------|-------------------------------------------------------------|------------------------------|
| HHS Members with<br>Migrant Percentage                                            | .118                  | -5.050                                                      | -2.303                       |
| HHS Members with<br>Disability percentage                                         | -.115                 | .790                                                        | -.939                        |
| Over Crowed > 2.5<br>Person per room<br>Percentage                                | .219                  | -1.197                                                      | -1.076                       |
| % of HHS members with<br>Educational Status<br>Illiterate summarized by<br>Kebele | .954                  | -10.688                                                     | 1.157                        |
| No toilet and Pit latrine<br>Shared Percentage                                    | -.144                 | -.210                                                       | 1.657                        |
| No Kitchen Percentage                                                             | .216                  | 1.478                                                       | -.753                        |
| Housing Age 20 years or<br>more Percent                                           | -1.455                | .815                                                        | 2.989                        |
| Tenure Not Owner<br>Occupied Percentage                                           | 2.701                 | 4.966                                                       | 4.893                        |
| No Ceiling Percentage                                                             | -.569                 | 4.622                                                       | 1.665                        |
| Dep_Elecgas                                                                       | .110                  | 3.377                                                       | 3.800                        |
| HHS with household<br>facilities deprivation<br>(Radio, TV, House<br>Phone)%      | -1.188                | -7.715                                                      | -2.945                       |
| Density (2007 Population<br>census /area Ha)                                      | -.647                 | 2.728                                                       | -1.213                       |
| Water not Private or<br>House connection percent                                  | .287                  | -1.851                                                      | -.408                        |
| Waste disposal percent<br>not in Public and Private                               | -.031                 | -.190                                                       | -.115                        |
| Old Dependency Ratio                                                              | 1.550                 | 2.861                                                       | .596                         |
| % of FHH with marital<br>status widowed or<br>divorced                            | -.251                 | -1.731                                                      | 4.242                        |
| Percent HHS not Degree<br>and Above Percentage                                    | .051                  | 1.648                                                       | -3.033                       |



**Inverse of Correlation Matrix**

|                                                       | HHS<br>Members with<br>Migrant<br>Percentage | HHS<br>Members with<br>Disability<br>percentage | Over Crowed<br>> 2.5 Person<br>per room<br>Percentage | % of HHS<br>members with<br>Educational<br>Status<br>Illiterate<br>summarized<br>by Kebele |
|-------------------------------------------------------|----------------------------------------------|-------------------------------------------------|-------------------------------------------------------|--------------------------------------------------------------------------------------------|
| HHS Floor Mud and<br>Bamboo Reed(%)                   | -.026                                        | .515                                            | -2.146                                                | -4.506                                                                                     |
| HHS Wood Mud with<br>Thatch/Wood/Stone(%)             | 1.064                                        | .203                                            | -1.421                                                | 2.657                                                                                      |
| Unemployment Rate<br>10_64 age                        | -.257                                        | -.081                                           | -.789                                                 | -.229                                                                                      |
| No Bath Percentage                                    | .118                                         | -.115                                           | .219                                                  | .954                                                                                       |
| Kerosine, Candle, Fuel<br>Wood and Lamp<br>Percentage | -5.050                                       | .790                                            | -1.197                                                | -10.688                                                                                    |
| Young Dependency Ratio                                | -2.303                                       | -.939                                           | -1.076                                                | 1.157                                                                                      |

**Inverse of Correlation Matrix**

|                                                       | No toilet and<br>Pit latrine<br>Shared<br>Percentage | No Kitchen<br>Percentage | Housing Age<br>20 years or<br>more Percent | Tenure Not<br>Owner<br>Occupied<br>Percentage |
|-------------------------------------------------------|------------------------------------------------------|--------------------------|--------------------------------------------|-----------------------------------------------|
| HHS Floor Mud and<br>Bamboo Reed(%)                   | -2.445                                               | 2.686                    | -6.542                                     | 5.302                                         |
| HHS Wood Mud with<br>Thatch/Wood/Stone(%)             | -1.239                                               | .152                     | -3.445                                     | -1.509                                        |
| Unemployment Rate<br>10_64 age                        | -.389                                                | -.263                    | .980                                       | 1.109                                         |
| No Bath Percentage                                    | -.144                                                | .216                     | -1.455                                     | 2.701                                         |
| Kerosine, Candle, Fuel<br>Wood and Lamp<br>Percentage | -.210                                                | 1.478                    | .815                                       | 4.966                                         |
| Young Dependency Ratio                                | 1.657                                                | -.753                    | 2.989                                      | 4.893                                         |

**Inverse of Correlation Matrix**

|                                                       | No Ceiling<br>Percentage | Dep_Elecgas | HHS with<br>household<br>facilities<br>deprivation<br>(Radio, TV,<br>House<br>Phone)% | Density (2007<br>Population<br>cenus /area<br>Ha) |
|-------------------------------------------------------|--------------------------|-------------|---------------------------------------------------------------------------------------|---------------------------------------------------|
| HHS Floor Mud and<br>Bamboo Reed(%)                   | -2.548                   | -3.778      | -5.457                                                                                | 3.360                                             |
| HHS Wood Mud with<br>Thatch/Wood/Stone(%)             | -2.964                   | -2.726      | 3.136                                                                                 | .718                                              |
| Unemployment Rate<br>10_64 age                        | 2.540                    | .326        | -1.779                                                                                | .028                                              |
| No Bath Percentage                                    | -.569                    | .110        | -1.188                                                                                | -.647                                             |
| Kerosine, Candle, Fuel<br>Wood and Lamp<br>Percentage | 4.622                    | 3.377       | -7.715                                                                                | 2.728                                             |
| Young Dependency Ratio                                | 1.665                    | 3.800       | -2.945                                                                                | -1.213                                            |

**Inverse of Correlation Matrix**

|                                                       | Water not<br>Private or<br>House<br>connection<br>percent | Waste<br>disposal<br>percent not in<br>Public and<br>Private | Old<br>Dependency<br>Ratio | % of FHH with<br>marital status<br>widowed or<br>divorced |
|-------------------------------------------------------|-----------------------------------------------------------|--------------------------------------------------------------|----------------------------|-----------------------------------------------------------|
| HHS Floor Mud and<br>Bamboo Reed(%)                   | 1.000                                                     | -1.533                                                       | 1.976                      | -2.360                                                    |
| HHS Wood Mud with<br>Thatch/Wood/Stone(%)             | -1.768                                                    | -1.855                                                       | -3.069                     | -1.672                                                    |
| Unemployment Rate<br>10_64 age                        | .438                                                      | -.869                                                        | .402                       | -1.721                                                    |
| No Bath Percentage                                    | .287                                                      | -.031                                                        | 1.550                      | -.251                                                     |
| Kerosine, Candle, Fuel<br>Wood and Lamp<br>Percentage | -1.851                                                    | -.190                                                        | 2.861                      | -1.731                                                    |
| Young Dependency Ratio                                | -.408                                                     | -.115                                                        | .596                       | 4.242                                                     |

**Inverse of Correlation Matrix**

|                                                       | Percent HHS<br>not Degree<br>and Above<br>Percentage | HHS Floor<br>Mud and<br>Bamboo Reed<br>(%) | HHS Wood<br>Mud with<br>Thatch/Wood/<br>Stone(%) | Unemployment<br>Rate 10_64<br>age |
|-------------------------------------------------------|------------------------------------------------------|--------------------------------------------|--------------------------------------------------|-----------------------------------|
| HHS Floor Mud and<br>Bamboo Reed(%)                   | .594                                                 | 18.988                                     | -1.504                                           | 1.365                             |
| HHS Wood Mud with<br>Thatch/Wood/Stone(%)             | -.131                                                | -1.504                                     | 7.977                                            | -.861                             |
| Unemployment Rate<br>10_64 age                        | -.233                                                | 1.365                                      | -.861                                            | 2.846                             |
| No Bath Percentage                                    | .051                                                 | 1.163                                      | -.685                                            | -.279                             |
| Kerosine, Candle, Fuel<br>Wood and Lamp<br>Percentage | 1.648                                                | 8.393                                      | -.776                                            | 1.655                             |
| Young Dependency Ratio                                | -3.033                                               | -5.498                                     | -.961                                            | -.298                             |

**Inverse of Correlation Matrix**

|                                                       | No Bath<br>Percentage | Kerosine,<br>Candle, Fuel<br>Wood and<br>Lamp<br>Percentage | Young<br>Dependency<br>Ratio |
|-------------------------------------------------------|-----------------------|-------------------------------------------------------------|------------------------------|
| HHS Floor Mud and<br>Bamboo Reed(%)                   | 1.163                 | 8.393                                                       | -5.498                       |
| HHS Wood Mud with<br>Thatch/Wood/Stone(%)             | -.685                 | -.776                                                       | -.961                        |
| Unemployment Rate<br>10_64 age                        | -.279                 | 1.655                                                       | -.298                        |
| No Bath Percentage                                    | 2.299                 | .631                                                        | .019                         |
| Kerosine, Candle, Fuel<br>Wood and Lamp<br>Percentage | .631                  | 16.088                                                      | -2.987                       |
| Young Dependency Ratio                                | .019                  | -2.987                                                      | 14.726                       |

**KMO and Bartlett's Test**

|                                                  |                    |
|--------------------------------------------------|--------------------|
| Kaiser-Meyer-Olkin Measure of Sampling Adequacy. | .842               |
| Bartlett's Test of Sphericity                    | Approx. Chi-Square |
|                                                  | 3151.339           |
|                                                  | df                 |
|                                                  | 253                |
|                                                  | Sig.               |
|                                                  | .000               |

**Communalities**

|                                                                          | Initial | Extraction |
|--------------------------------------------------------------------------|---------|------------|
| HHS Members with Migrant Percentage                                      | 1.000   | .869       |
| HHS Members with Disability percentage                                   | 1.000   | .349       |
| Over Crowed > 2.5 Person per room Percentage                             | 1.000   | .855       |
| % of HHS members with Educational Status Illiterate summarized by Kebele | 1.000   | .899       |
| No toilet and Pit latrine Shared Percentage                              | 1.000   | .763       |
| No Kitchen Percentage                                                    | 1.000   | .788       |
| Housing Age 20 years or more Percent                                     | 1.000   | .935       |
| Tenure Not Owner Occupied Percentage                                     | 1.000   | .919       |
| No Ceiling Percentage                                                    | 1.000   | .922       |
| Dep_Elecgas                                                              | 1.000   | .869       |
| HHS with household facilities deprivation (Radio, TV, House Phone)%      | 1.000   | .938       |
| Density (2007 Population census /area Ha)                                | 1.000   | .730       |
| Water not Private or House connection percent                            | 1.000   | .667       |
| Waste disposal percent not in Public and Private                         | 1.000   | .851       |
| Old Dependency Ratio                                                     | 1.000   | .890       |
| % of FHH with marital status widowed or divorced                         | 1.000   | .889       |
| Percent HHS not Degree and Above Percentage                              | 1.000   | .763       |
| HHS Floor Mud and Bamboo Reed(%)                                         | 1.000   | .930       |
| HHS Wood Mud with Thatch/Wood/Stone(%)                                   | 1.000   | .817       |
| Unemployment Rate 10_64 age                                              | 1.000   | .613       |

### Communalities

|                                                       | Initial | Extraction |
|-------------------------------------------------------|---------|------------|
| No Bath Percentage                                    | 1.000   | .598       |
| Kerosine, Candle, Fuel<br>Wood and Lamp<br>Percentage | 1.000   | .925       |
| Young Dependency Ratio                                | 1.000   | .904       |

Extraction Method: Principal Component Analysis.

### Total Variance Explained

| Component | Initial Eigenvalues |               |              | Extraction Sums of Squared Loadings |               |              |
|-----------|---------------------|---------------|--------------|-------------------------------------|---------------|--------------|
|           | Total               | % of Variance | Cumulative % | Total                               | % of Variance | Cumulative % |
| 1         | 9.258               | 40.250        | 40.250       | 9.258                               | 40.250        | 40.250       |
| 2         | 6.204               | 26.972        | 67.222       | 6.204                               | 26.972        | 67.222       |
| 3         | 2.120               | 9.218         | 76.441       | 2.120                               | 9.218         | 76.441       |
| 4         | 1.100               | 4.783         | 81.224       | 1.100                               | 4.783         | 81.224       |
| 5         | .906                | 3.937         | 85.161       |                                     |               |              |
| 6         | .774                | 3.366         | 88.527       |                                     |               |              |
| 7         | .653                | 2.837         | 91.365       |                                     |               |              |
| 8         | .381                | 1.656         | 93.021       |                                     |               |              |
| 9         | .263                | 1.146         | 94.167       |                                     |               |              |
| 10        | .236                | 1.028         | 95.195       |                                     |               |              |
| 11        | .182                | .791          | 95.985       |                                     |               |              |
| 12        | .175                | .762          | 96.747       |                                     |               |              |
| 13        | .149                | .647          | 97.394       |                                     |               |              |
| 14        | .126                | .549          | 97.943       |                                     |               |              |
| 15        | .092                | .399          | 98.342       |                                     |               |              |
| 16        | .081                | .352          | 98.694       |                                     |               |              |
| 17        | .076                | .331          | 99.025       |                                     |               |              |
| 18        | .063                | .274          | 99.299       |                                     |               |              |
| 19        | .053                | .230          | 99.529       |                                     |               |              |
| 20        | .051                | .223          | 99.752       |                                     |               |              |
| 21        | .027                | .117          | 99.869       |                                     |               |              |
| 22        | .016                | .069          | 99.939       |                                     |               |              |
| 23        | .014                | .061          | 100.000      |                                     |               |              |

**Total Variance Explained**

| Component | Rotation Sums of Squared Loadings |               |              |
|-----------|-----------------------------------|---------------|--------------|
|           | Total                             | % of Variance | Cumulative % |
| 1         | 8.409                             | 36.563        | 36.563       |
| 2         | 5.598                             | 24.339        | 60.902       |
| 3         | 3.306                             | 14.372        | 75.274       |
| 4         | 1.369                             | 5.950         | 81.224       |
| 5         |                                   |               |              |
| 6         |                                   |               |              |
| 7         |                                   |               |              |
| 8         |                                   |               |              |
| 9         |                                   |               |              |
| 10        |                                   |               |              |
| 11        |                                   |               |              |
| 12        |                                   |               |              |
| 13        |                                   |               |              |
| 14        |                                   |               |              |
| 15        |                                   |               |              |
| 16        |                                   |               |              |
| 17        |                                   |               |              |
| 18        |                                   |               |              |
| 19        |                                   |               |              |
| 20        |                                   |               |              |
| 21        |                                   |               |              |
| 22        |                                   |               |              |
| 23        |                                   |               |              |

Extraction Method: Principal Component Analysis.

**Component Matrix<sup>a</sup>**

|                                                                          | Component |       |       |      |
|--------------------------------------------------------------------------|-----------|-------|-------|------|
|                                                                          | 1         | 2     | 3     | 4    |
| No Ceiling Percentage                                                    | .955      |       |       |      |
| HHS with household facilities deprivation (Radio, TV, House Phone)%      | .935      |       |       |      |
| Young Dependency Ratio                                                   | .932      |       |       |      |
| Waste disposal percent not in Public and Private                         | .915      |       |       |      |
| HHS Floor Mud and Bamboo Reed(%)                                         | .868      | .316  |       |      |
| Dep_Elecgas                                                              | .812      |       |       |      |
| Tenure Not Owner Occupied Percentage                                     | -.805     | .462  |       |      |
| Kerosine, Candle, Fuel Wood and Lamp Percentage                          | .725      |       | -.573 |      |
| Water not Private or House connection percent                            | .672      | .406  |       |      |
| No toilet and Pit latrine Shared Percentage                              | .627      | .587  |       |      |
| Percent HHS not Degree and Above Percentage                              | .609      | .496  | .377  |      |
| HHS Wood Mud with Thatch/Wood/Stone(%)                                   |           | .841  |       |      |
| Over Crowed > 2.5 Person per room Percentage                             |           | .810  | .382  |      |
| % of FHH with marital status widowed or divorced                         | -.509     | .772  |       |      |
| Old Dependency Ratio                                                     |           | .703  | -.520 |      |
| Housing Age 20 years or more Percent                                     | -.659     | .691  |       |      |
| % of HHS members with Educational Status Illiterate summarized by Kebele | .625      | .656  |       |      |
| Density (2007 Population census /area Ha)                                | -.482     | .629  |       |      |
| No Bath Percentage                                                       |           | -.555 | .356  | .315 |

**Component Matrix<sup>a</sup>**

|                                        | Component |      |       |      |
|----------------------------------------|-----------|------|-------|------|
|                                        | 1         | 2    | 3     | 4    |
| HHS Members with Disability percentage |           | .526 |       |      |
| Unemployment Rate 10_64 age            | -.437     | .498 | .376  |      |
| HHS Members with Migrant Percentage    | .416      | .453 | -.701 |      |
| No Kitchen Percentage                  | -.315     | .396 |       | .704 |

Extraction Method: Principal Component Analysis.

a. 4 components extracted.

**Rotated Component Matrix<sup>a</sup>**

|                                                                          | Component |       |      |      |
|--------------------------------------------------------------------------|-----------|-------|------|------|
|                                                                          | 1         | 2     | 3    | 4    |
| HHS with household facilities deprivation (Radio, TV, House Phone)%      | .938      |       |      |      |
| HHS Floor Mud and Bamboo Reed(%)                                         | .928      |       |      |      |
| Dep_Elecgas                                                              | .886      |       |      |      |
| No toilet and Pit latrine Shared Percentage                              | .829      |       |      |      |
| Percent HHS not Degree and Above Percentage                              | .826      |       |      |      |
| No Ceiling Percentage                                                    | .819      | -.484 |      |      |
| Water not Private or House connection percent                            | .809      |       |      |      |
| Waste disposal percent not in Public and Private                         | .796      | -.427 |      |      |
| % of HHS members with Educational Status Illiterate summarized by Kebele | .783      |       | .438 | .301 |
| Young Dependency Ratio                                                   | .767      | -.530 |      |      |
| Kerosine, Candle, Fuel Wood and Lamp Percentage                          | .597      | -.520 | .359 | .411 |
| Over Crowed > 2.5 Person per room Percentage                             | .305      | .850  |      |      |



**Rotated Component Matrix<sup>a</sup>**

|                                                  | Component |      |       |      |
|--------------------------------------------------|-----------|------|-------|------|
|                                                  | 1         | 2    | 3     | 4    |
| Tenure Not Owner Occupied Percentage             | -.471     | .812 |       |      |
| Unemployment Rate 10_64 age                      |           | .768 |       |      |
| Density (2007 Population census /area Ha)        |           | .759 |       | .324 |
| Housing Age 20 years or more Percent             | -.321     | .703 | .566  |      |
| % of FHH with marital status widowed or divorced |           | .670 | .620  |      |
| HHS Wood Mud with Thatch/Wood/Stone(%)           | .556      | .586 | .388  |      |
| HHS Members with Disability percentage           |           | .484 |       |      |
| Old Dependency Ratio                             |           |      | .897  |      |
| HHS Members with Migrant Percentage              | .415      |      | .727  | .317 |
| No Bath Percentage                               |           |      | -.714 |      |
| No Kitchen Percentage                            |           | .376 |       | .786 |

Extraction Method: Principal Component Analysis.  
Rotation Method: Varimax with Kaiser Normalization.

a. Rotation converged in 9 iterations.

**Component Transformation Matrix**

| Component | 1    | 2     | 3     | 4     |
|-----------|------|-------|-------|-------|
| 1         | .883 | -.461 | -.085 | -.026 |
| 2         | .421 | .695  | .561  | .157  |
| 3         | .204 | .546  | -.726 | -.366 |
| 4         | .034 | .086  | -.388 | .917  |

Extraction Method: Principal Component Analysis.  
Rotation Method: Varimax with Kaiser Normalization.

**Component Score Coefficient Matrix**

|                                                                          | Component |       |       |       |
|--------------------------------------------------------------------------|-----------|-------|-------|-------|
|                                                                          | 1         | 2     | 3     | 4     |
| HHS Members with Migrant Percentage                                      | .003      | -.150 | .277  | .131  |
| HHS Members with Disability percentage                                   | .036      | .091  | .060  | -.172 |
| Over Crowed > 2.5 Person per room Percentage                             | .084      | .210  | -.122 | .111  |
| % of HHS members with Educational Status Illiterate summarized by Kebele | .085      | -.010 | .089  | .171  |
| No toilet and Pit latrine Shared Percentage                              | .112      | .068  | .019  | -.064 |
| No Kitchen Percentage                                                    | .000      | .065  | -.144 | .630  |
| Housing Age 20 years or more Percent                                     | -.031     | .070  | .135  | .001  |
| Tenure Not Owner Occupied Percentage                                     | -.025     | .146  | -.006 | -.080 |
| No Ceiling Percentage                                                    | .087      | -.054 | -.032 | .065  |
| Dep_Elecgas                                                              | .118      | .051  | -.010 | -.223 |
| HHS with household facilities deprivation (Radio, TV, House Phone)%      | .110      | -.009 | -.003 | .012  |
| Density (2007 Population census /area Ha)                                | .019      | .153  | -.088 | .233  |
| Water not Private or House connection percent                            | .114      | .071  | -.073 | .058  |
| Waste disposal percent not in Public and Private                         | .091      | -.032 | -.062 | .054  |
| Old Dependency Ratio                                                     | -.032     | -.065 | .339  | -.117 |
| % of FHH with marital status widowed or divorced                         | -.014     | .063  | .147  | .028  |
| Percent HHS not Degree and Above Percentage                              | .130      | .127  | -.111 | -.005 |
| HHS Floor Mud and Bamboo Reed(%)                                         | .115      | .021  | .036  | -.203 |
| HHS Wood Mud with Thatch/Wood/Stone(%)                                   | .088      | .120  | .074  | -.169 |
| Unemployment Rate 10_64 age                                              | .034      | .188  | -.143 | .099  |

### Component Score Coefficient Matrix

|                                                       | Component |       |       |      |
|-------------------------------------------------------|-----------|-------|-------|------|
|                                                       | 1         | 2     | 3     | 4    |
| No Bath Percentage                                    | .030      | .042  | -.286 | .187 |
| Kerosine, Candle, Fuel<br>Wood and Lamp<br>Percentage | .031      | -.150 | .128  | .279 |
| Young Dependency Ratio                                | .080      | -.064 | -.047 | .119 |

Extraction Method: Principal Component Analysis.  
Rotation Method: Varimax with Kaiser Normalization.  
Component Scores.

### Component Score Covariance Matrix

| Component | 1     | 2     | 3     | 4     |
|-----------|-------|-------|-------|-------|
| 1         | 1.000 | .000  | .000  | .000  |
| 2         | .000  | 1.000 | .000  | .000  |
| 3         | .000  | .000  | 1.000 | .000  |
| 4         | .000  | .000  | .000  | 1.000 |

Extraction Method: Principal Component Analysis.  
Rotation Method: Varimax with Kaiser Normalization.  
Component Scores.

```

DATASET ACTIVATE DataSet1.
SAVE OUTFILE='G:\Kebele _Addis Ababa\AA\Aggregate_April\HH14SE_AGGApril2020_Final_Final.sav'
/COMPRESSED.
COMPUTE FNSC=(40.250 /81.224 ) * (FAC1_1) + (26.972 / 81.224) * (FAC2_1) + (9
.218 / 81.224) * (FAC3_1) + (4.783 / 81.224) * (FAC4_1).
EXECUTE.
DATASET ACTIVATE DataSet1.
SAVE OUTFILE='G:\Kebele _Addis Ababa\AA\Aggregate_April\HH14SE_AGGApril2020_Final_Final.sav'
/COMPRESSED.
SORT CASES BY FNSC (A).
SORT CASES BY FNSC (A).
COMPUTE FUSC=(FNSC - ( - 1.90)).
EXECUTE.
SORT CASES BY FNSC (A).
COMPUTE FUSC=(FNSC - ( -1.8982)).
EXECUTE.
SORT CASES BY FUSC (D).
SORT CASES BY FUSC (A).
SORT CASES BY FNSC (A).

```

```

SORT CASES BY FNSC (D).
COMPUTE FLSC=(1.3954 - ( - 1.8982)).
EXECUTE.
DATASET ACTIVATE DataSet1.
SAVE OUTFILE='G:\Kebele _Addis Ababa\AA\Aggregate_April\HH14SE_AGGApril2020_Final_Final.sav'
/COMPRESSED.
COMPUTE FMDI=(FUSC) / (FLSC) * 100.
EXECUTE.
DATASET ACTIVATE DataSet1.
SAVE OUTFILE='G:\Kebele _Addis Ababa\AA\Aggregate_April\HH14SE_AGGApril2020_Final_Final.sav'
/COMPRESSED.
DATASET ACTIVATE DataSet1.
SAVE OUTFILE='G:\Kebele _Addis Ababa\AA\Aggregate_April\HH14SE_AGGApril2020_Final_Final.sav'
/COMPRESSED.
DATASET ACTIVATE DataSet1.
SAVE OUTFILE='G:\Kebele _Addis Ababa\AA\Aggregate_April\HH14SE_AGGApril2020_Final_Final.sav'
/COMPRESSED.
SORT CASES BY Dimens_1 (A).
SORT CASES BY Dimens_1 (D).
COMPUTE DIMST1=(Dimens_1 - (-2.20418)) / (3.96883 - (-2.20418)) * 100.
EXECUTE.
SORT CASES BY Dimens_2 (A).
SORT CASES BY Dimens_2 (D).
COMPUTE DIMST2=(Dimens_2 - ( - 3.61820)) / (2.16819 - (-3.61820)) * 100.
EXECUTE.
DATASET ACTIVATE DataSet1.
SAVE OUTFILE='G:\Kebele _Addis Ababa\AA\Aggregate_April\HH14SE_AGGApril2020_Final_Final.sav'
/COMPRESSED.
SORT CASES BY Dimens_3 (A).
SORT CASES BY Dimens_3 (D).
DATASET ACTIVATE DataSet1.
SAVE OUTFILE='G:\Kebele _Addis Ababa\AA\Aggregate_April\HH14SE_AGGApril2020_Final_Final.sav'
/COMPRESSED.
SORT CASES BY Dimens_3 (A).
SORT CASES BY Dimens_3 (D).
COMPUTE DIMST3=(Dimens_3 - ( - 2.44428)) / (4.09502 - (-2.44428)) * 100.

```

```

EXECUTE.
DATASET ACTIVATE DataSet1.
SAVE OUTFILE='G:\Kebele _Addis Ababa\AA\Aggregate_April\HH14SE_AGGApril2020_Final_Final.sav'
/COMPRESSED.
SORT CASES BY Dimens_4 (A).
SORT CASES BY Dimens_4 (D).
COMPUTE DIMST4=(Dimens_4 - ( - 1.94126)) / (2.80920 - (-1.94126)) * 100.
EXECUTE.
DATASET ACTIVATE DataSet1.
SAVE OUTFILE='G:\Kebele _Addis Ababa\AA\Aggregate_April\HH14SE_AGGApril2020_Final_Final.sav'
/COMPRESSED.

SAVE TRANSLATE OUTFILE='G:\Kebele _Addis Ababa\AA\Aggregate_April\Census07_Adis_Final.dbf'
/TYPE=DBF
/VERSION=4
/MAP
/REPLACE.

>Warning # 6421. Text: Region_name changed to REGION_NAM
>A long variable name was truncated to conform to the conventions of the output
>file type.

>Warning # 6421. Text: Regional_code changed to REGIONAL_C
>A long variable name was truncated to conform to the conventions of the output
>file type.

>Warning # 6421. Text: Subcity_name changed to SUBCITY_NA
>A long variable name was truncated to conform to the conventions of the output
>file type.

>Warning # 6421. Text: Kebele_code changed to KEBELE_COD
>A long variable name was truncated to conform to the conventions of the output
>file type.

>Warning # 6421. Text: Floor_Depriv changed to FLOOR_DEPR

```

>A long variable name was truncated to conform to the conventions of the output  
>file type.

>Warning # 6421. Text: Wall\_Depriv changed to WALL\_DEPRI  
>A long variable name was truncated to conform to the conventions of the output  
>file type.

>Warning # 6421. Text: Kebele\_name changed to KEBELE\_NAM  
>A long variable name was truncated to conform to the conventions of the output  
>file type.

>Warning # 6421. Text: Overall\_Dep changed to OVERALL\_DE  
>A long variable name was truncated to conform to the conventions of the output  
>file type.

>Warning # 6421. Text: Unemp\_10\_64 changed to UNEMP\_10\_6  
>A long variable name was truncated to conform to the conventions of the output  
>file type.

>Warning # 6421. Text: NotDeg\_Hmemb changed to NOTDEG\_HME  
>A long variable name was truncated to conform to the conventions of the output  
>file type.

>Warning # 6421. Text: Totexp\_AD\_mean16 changed to TOTEXP\_AD  
>A long variable name was truncated to conform to the conventions of the output  
>file type.

>Warning # 6421. Text: InCAE\_Month changed to INCAE\_MONT  
>A long variable name was truncated to conform to the conventions of the output  
>file type.

>Warning # 6421. Text: Grade9\_10\_Per changed to GRADE9\_10  
>A long variable name was truncated to conform to the conventions of the output  
ut

>file type.

>Warning # 6421. Text: Subcity\_Code changed to SUBCITY\_CO

>A long variable name was truncated to conform to the conventions of the output

>file type.

>Warning # 6421. Text: Dep\_Elecgas changed to DEP\_ELECGA

>A long variable name was truncated to conform to the conventions of the output

>file type.

>Warning # 6421. Text: Dep\_Housefac changed to DEP\_HOUSEF

>A long variable name was truncated to conform to the conventions of the output

>file type.

>Warning # 6421. Text: Dep\_Ceiling changed to DEP\_CEILIN

>A long variable name was truncated to conform to the conventions of the output

>file type.

>Warning # 6421. Text: WasteNotdisp changed to WASTENOTDI

>A long variable name was truncated to conform to the conventions of the output

>file type.

>Warning # 6421. Text: Tenure\_Owner changed to TENURE\_OWN

>A long variable name was truncated to conform to the conventions of the output

>file type.

>Warning # 6421. Text: Tenure\_Notowner changed to TENURE\_NOT

>A long variable name was truncated to conform to the conventions of the output

>file type.

>Warning # 6421. Text: No\_Eleclight changed to NO\_ELECLIG

>A long variable name was truncated to conform to the conventions of the output

>file type.

>Warning # 6421. Text: Wat\_NotPrHopipe changed to WAT\_NOTPRH  
>A long variable name was truncated to conform to the conventions of the output  
>file type.

>Warning # 6421. Text: Water\_Improv changed to WATER\_IMPR  
>A long variable name was truncated to conform to the conventions of the output  
>file type.

>Warning # 6421. Text: Illiteracy\_Per changed to ILLITERACY  
>A long variable name was truncated to conform to the conventions of the output  
>file type.

>Warning # 6421. Text: Migrant\_Per changed to MIGRANT\_PE  
>A long variable name was truncated to conform to the conventions of the output  
>file type.

Data written to G:\Kebele \_Addis Ababa\AA\Aggregate\_April\Census07\_Addis\_Final.dbf.

83 variables and 99 cases written.

|                         |              |           |        |
|-------------------------|--------------|-----------|--------|
| Variable: D_R           | Type: String | Width: 1  |        |
| Variable: OBJECTID      | Type: Number | Width: 10 | Dec: 0 |
| Variable: REGION_NAME   | Type: String | Width: 30 |        |
| Variable: REGIONAL_CODE | Type: Number | Width: 10 | Dec: 0 |
| Variable: ZONE_NAME     | Type: String | Width: 2  |        |
| Variable: Z_CODE        | Type: Number | Width: 2  | Dec: 0 |
| Variable: W_NAME        | Type: String | Width: 8  |        |
| Variable: W_CODE        | Type: Number | Width: 10 | Dec: 0 |
| Variable: RK_NAME       | Type: String | Width: 30 |        |
| Variable: RK_CODE       | Type: Number | Width: 19 | Dec: 0 |
| Variable: COUNT         | Type: Number | Width: 19 | Dec: 0 |
| Variable: TOWN_NAME     | Type: String | Width: 30 |        |
| Variable: TOWN_CODE     | Type: Number | Width: 10 | Dec: 0 |
| Variable: KK_CODE       | Type: Number | Width: 10 | Dec: 0 |
| Variable: SUBCITY_NAME  | Type: String | Width: 30 |        |
| Variable: KEBELE_CODE   | Type: String | Width: 3  |        |
| Variable: FLOOR_DEPR    | Type: Number | Width: 8  | Dec: 2 |
| Variable: WALL_DEPRI    | Type: Number | Width: 8  | Dec: 2 |
| Variable: KEBELE_NAME   | Type: String | Width: 30 |        |



|                      |              |           |        |
|----------------------|--------------|-----------|--------|
| Variable: AGE0_14    | Type: Number | Width: 8  | Dec: 2 |
| Variable: AGE15_64   | Type: Number | Width: 8  | Dec: 2 |
| Variable: AGE65_PLUS | Type: Number | Width: 8  | Dec: 2 |
| Variable: YOUND_DEP  | Type: Number | Width: 8  | Dec: 2 |
| Variable: OLD_DEP    | Type: Number | Width: 8  | Dec: 2 |
| Variable: OVERALL_DE | Type: Number | Width: 8  | Dec: 2 |
| Variable: UNEMP_10_6 | Type: Number | Width: 8  | Dec: 2 |
| Variable: FHH_WDPER  | Type: Number | Width: 8  | Dec: 2 |
| Variable: DEG_HMEMB  | Type: Number | Width: 8  | Dec: 2 |
| Variable: NOTDEG_HME | Type: Number | Width: 8  | Dec: 2 |
| Variable: HSLOPE_PER | Type: Number | Width: 8  | Dec: 2 |
| Variable: TOTEXP_AD  | Type: Number | Width: 8  | Dec: 2 |
| Variable: INCAE_MONT | Type: Number | Width: 8  | Dec: 2 |
| Variable: GRADE9_10  | Type: Number | Width: 8  | Dec: 2 |
| Variable: UK_ID      | Type: String | Width: 20 |        |
| Variable: MD_CODE    | Type: String | Width: 4  |        |
| Variable: SUBCITY_CO | Type: String | Width: 3  |        |
| Variable: MUID_CODE  | Type: String | Width: 8  |        |
| Variable: PERIMETER  | Type: Number | Width: 19 | Dec: 0 |
| Variable: SHAPE_AREA | Type: Number | Width: 19 | Dec: 0 |
| Variable: POPULATION | Type: Number | Width: 19 | Dec: 0 |
| Variable: DENSITY    | Type: Number | Width: 19 | Dec: 0 |
| Variable: AREA_HA    | Type: Number | Width: 19 | Dec: 0 |
| Variable: UNIQUE     | Type: Number | Width: 10 | Dec: 0 |
| Variable: MDI_CODE   | Type: String | Width: 8  |        |
| Variable: ELGAS_PERC | Type: Number | Width: 13 | Dec: 0 |
| Variable: DEP_ELECGA | Type: Number | Width: 8  | Dec: 2 |
| Variable: DEP_HOUSEF | Type: Number | Width: 8  | Dec: 2 |
| Variable: HOUSE_FAC  | Type: Number | Width: 13 | Dec: 0 |
| Variable: HH_HOMELES | Type: Number | Width: 13 | Dec: 0 |
| Variable: DEP_ROOF   | Type: Number | Width: 13 | Dec: 0 |
| Variable: DEP_CEILIN | Type: Number | Width: 13 | Dec: 0 |
| Variable: IMPFLOOR   | Type: Number | Width: 13 | Dec: 0 |
| Variable: IMPWALL    | Type: Number | Width: 13 | Dec: 0 |
| Variable: WASTENOTDI | Type: Number | Width: 8  | Dec: 2 |
| Variable: WASDISP_PE | Type: Number | Width: 13 | Dec: 0 |
| Variable: TENURE_OWN | Type: Number | Width: 13 | Dec: 0 |
| Variable: TENURE_NOT | Type: Number | Width: 8  | Dec: 2 |
| Variable: NO_ELECLIG | Type: Number | Width: 13 | Dec: 0 |
| Variable: NO_KITCHEN | Type: Number | Width: 13 | Dec: 0 |
| Variable: NO_BATH    | Type: Number | Width: 13 | Dec: 0 |
| Variable: SAN_DEPR   | Type: Number | Width: 13 | Dec: 0 |

|                      |              |           |        |
|----------------------|--------------|-----------|--------|
| Variable: WAT_NOTPRH | Type: Number | Width: 8  | Dec: 2 |
| Variable: WATER_IMPR | Type: Number | Width: 13 | Dec: 0 |
| Variable: HHAGE_PER  | Type: Number | Width: 13 | Dec: 0 |
| Variable: OVERCROWED | Type: Number | Width: 13 | Dec: 0 |
| Variable: ILLITERACY | Type: Number | Width: 13 | Dec: 0 |
| Variable: DIPLOMA_AB | Type: Number | Width: 13 | Dec: 0 |
| Variable: DISAB_PER  | Type: Number | Width: 13 | Dec: 0 |
| Variable: MIGRANT_PE | Type: Number | Width: 13 | Dec: 0 |
| Variable: SEMP_PER   | Type: Number | Width: 13 | Dec: 0 |
| Variable: MDI_CODE1  | Type: String | Width: 8  |        |
| Variable: UNEMP_PER  | Type: Number | Width: 13 | Dec: 0 |
| Variable: DIMENS_1   | Type: Number | Width: 11 | Dec: 5 |
| Variable: DIMENS_2   | Type: Number | Width: 11 | Dec: 5 |
| Variable: DIMENS_3   | Type: Number | Width: 11 | Dec: 5 |
| Variable: DIMENS_4   | Type: Number | Width: 11 | Dec: 5 |
| Variable: FNSC       | Type: Number | Width: 8  | Dec: 4 |
| Variable: FUSC       | Type: Number | Width: 8  | Dec: 4 |
| Variable: FLSC       | Type: Number | Width: 8  | Dec: 2 |
| Variable: FMDI_07    | Type: Number | Width: 8  | Dec: 2 |
| Variable: DIMST1     | Type: Number | Width: 8  | Dec: 2 |
| Variable: DIMST2     | Type: Number | Width: 8  | Dec: 2 |
| Variable: DIMST3     | Type: Number | Width: 8  | Dec: 2 |
| Variable: DIMST4     | Type: Number | Width: 8  | Dec: 2 |

SORT CASES BY FNSC (A) .  
 SORT CASES BY FNSC (D) .  
 SORT CASES BY FNSC (A) .  
 SORT CASES BY FNSC (D) .
