# Supplementary material
Source: MDPI journal article supplement (https://www.mdpi.com/2071-1050/15/3/1934)
Supplement: s1 [file s1]

**Component Matrix<sup>a</sup>**

|                                        | Component |      |       |      |
|----------------------------------------|-----------|------|-------|------|
|                                        | 1         | 2    | 3     | 4    |
| HHS Members with Disability percentage |           | .526 |       |      |
| Unemployment Rate 10_64 age            | -.437     | .498 | .376  |      |
| HHS Members with Migrant Percentage    | .416      | .453 | -.701 |      |
| No Kitchen Percentage                  | -.315     | .396 |       | .704 |

Extraction Method: Principal Component Analysis.

a. 4 components extracted.

**Rotated Component Matrix<sup>a</sup>**

|                                                                          | Component |       |      |      |
|--------------------------------------------------------------------------|-----------|-------|------|------|
|                                                                          | 1         | 2     | 3    | 4    |
| HHS with household facilities deprivation (Radio, TV, House Phone)%      | .938      |       |      |      |
| HHS Floor Mud and Bamboo Reed(%)                                         | .928      |       |      |      |
| Dep_Elecgas                                                              | .886      |       |      |      |
| No toilet and Pit latrine Shared Percentage                              | .829      |       |      |      |
| Percent HHS not Degree and Above Percentage                              | .826      |       |      |      |
| No Ceiling Percentage                                                    | .819      | -.484 |      |      |
| Water not Private or House connection percent                            | .809      |       |      |      |
| Waste disposal percent not in Public and Private                         | .796      | -.427 |      |      |
| % of HHS members with Educational Status Illiterate summarized by Kebele | .783      |       | .438 | .301 |
| Young Dependency Ratio                                                   | .767      | -.530 |      |      |
| Kerosine, Candle, Fuel Wood and Lamp Percentage                          | .597      | -.520 | .359 | .411 |
| Over Crowed > 2.5 Person per room Percentage                             | .305      | .850  |      |      |
