# Supplementary material
Source: MDPI journal article supplement (https://www.mdpi.com/2071-1050/15/3/1934)
Supplement: s1 [file s1]

**Rotated Component Matrix<sup>a</sup>**

|                                                                      | Component |       |       |
|----------------------------------------------------------------------|-----------|-------|-------|
|                                                                      | 1         | 2     | 3     |
| HHS with educational status illiterate for 2015/16 (%)               | .299      | .703  | .323  |
| HHS not having Degree and above for 2015/16(%)                       | -.312     | .572  | -.010 |
| HHS employed in self-employed formal for 2015/16(%)                  | -.020     | .774  | -.024 |
| Unemployment % from economically active age group(10-64) for 2015/16 | .478      | -.168 | -.082 |
| Female HSS Widowed or Divorced for 2015/16(%)                        | .777      | .196  | -.027 |
| % of HHS with age 65 and above                                       | .779      | .009  | .018  |
| Population per hectare                                               | .584      | .371  | -.473 |
| Green per capita per 1000 population                                 | .012      | .097  | .893  |
| Road area in hectare per 1000population                              | -.183     | .076  | .931  |
| HHS with disability for 2015/16(%)                                   | .096      | .432  | -.163 |
| Income per Adult Equivalent per Month for 2015/16                    | -.096     | -.719 | -.147 |
| Built-up area per kebele area in m2                                  | .660      | .232  | -.540 |

Extraction Method: Principal Component Analysis.  
 Rotation Method: Varimax with Kaiser Normalization.

a. Rotation converged in 6 iterations.

**Component Transformation Matrix**

| Component | 1    | 2     | 3     |
|-----------|------|-------|-------|
| 1         | .742 | .406  | -.533 |
| 2         | .000 | .795  | .606  |
| 3         | .670 | -.450 | .591  |

Extraction Method: Principal Component Analysis.  
 Rotation Method: Varimax with Kaiser Normalization.
