# Supplementary material
Source: MDPI journal article supplement (https://www.mdpi.com/2071-1050/15/3/1934)
Supplement: s1 [file s1]

FACTOR

```

/VARIABLES IlliterPer_16 Degdepriv_16 SelfempFR_16 Unempper_16 FWDPer_16 Ol
dab65per_16 Pophu GreencapTHU Roadha_Thpop DisabPer_16 ExpADM_16 BdenkebA
/MISSING MEANSUB
/ANALYSIS IlliterPer_16 Degdepriv_16 SelfempFR_16 Unempper_16 FWDPer_16 Old
ab65per_16 Pophu GreencapTHU Roadha_Thpop DisabPer_16 ExpADM_16 BdenkebA
/PRINT UNIVARIATE INITIAL CORRELATION SIG DET KMO EXTRACTION ROTATION
/PLOT EIGEN
/CRITERIA MINEIGEN(1) ITERATE(25)
/EXTRACTION PC
/CRITERIA ITERATE(25)
/ROTATION VARIMAX
/SAVE REG(ALL)
/METHOD=CORRELATION.

```

## Factor Analysis

[DataSet1] C:\Gizachew\_article\Third\_Journal\analysis\Expenditure\_2016\_MDI\_No  
v2020.sav

**Descriptive Statistics**

|                                                                      | Mean     | Std. Deviation <sup>a</sup> | Analysis N <sup>a</sup> | Missing N |
|----------------------------------------------------------------------|----------|-----------------------------|-------------------------|-----------|
| HHS with educational status illiterate for 2015/16 (%)               | 15.9391  | 9.37795                     | 99                      | 6         |
| HHS not having Degree and above for 2015/16(%)                       | 96.0804  | 5.31592                     | 99                      | 6         |
| HHS employed in self-employed formal for 2015/16(%)                  | 11.9091  | 9.19991                     | 99                      | 6         |
| Unemployment % from economically active age group(10-64) for 2015/16 | 22.2553  | 8.95731                     | 99                      | 6         |
| Female HSS Widowed or Divorced for 2015/16(%)                        | 23.0522  | 9.57467                     | 99                      | 6         |
| % of HHS with age 65 and above                                       | 15.2635  | 7.75089                     | 99                      | 6         |
| Population per hectare                                               | 195.6928 | 170.60824                   | 99                      | 0         |
| Green per capita per 1000 population                                 | 13.3012  | 63.46507                    | 99                      | 0         |

### Descriptive Statistics

|                                                   | Mean      | Std. Deviation <sup>a</sup> | Analysis N <sup>a</sup> | Missing N |
|---------------------------------------------------|-----------|-----------------------------|-------------------------|-----------|
| Road area in hectare per 1000population           | 1.7230    | 2.32970                     | 99                      | 0         |
| HHS with disability for 2015/16(%)                | 2.4632    | 2.57706                     | 99                      | 6         |
| Income per Adult Equivalent per Month for 2015/16 | 2350.9991 | 606.64459                   | 99                      | 6         |
| Built-up area per kebele area in m2               | .2537     | .13784                      | 99                      | 0         |

a. For each variable, missing values are replaced with the variable mean.

### Correlation Matrix<sup>a</sup>

|             |                                                        | HHS with educational status illiterate for 2015/16 (%) | HHS not having Degree and above for 2015/16(%) | HHS employed in self-employed formal for 2015/16(%) |
|-------------|--------------------------------------------------------|--------------------------------------------------------|------------------------------------------------|-----------------------------------------------------|
| Correlation | HHS with educational status illiterate for 2015/16 (%) | 1.000                                                  | .279                                           | .479                                                |
|             | HHS not having Degree and above for 2015/16(%)         | .279                                                   | 1.000                                          | .215                                                |

### Correlation Matrix<sup>a</sup>

|             |                                                        | Unemployment % from economically active age group(10-64) for 2015/16 | Female HSS Widowed or Divorced for 2015/16(%) | % of HHS with age 65 and above |
|-------------|--------------------------------------------------------|----------------------------------------------------------------------|-----------------------------------------------|--------------------------------|
| Correlation | HHS with educational status illiterate for 2015/16 (%) | .061                                                                 | .297                                          | .249                           |
|             | HHS not having Degree and above for 2015/16(%)         | -.091                                                                | -.006                                         | -.178                          |

**Correlation Matrix<sup>a</sup>**

|             |                                                              | Population per<br>hectare | Green per<br>capita per<br>1000<br>population | Road area in<br>hectare per<br>1000population |
|-------------|--------------------------------------------------------------|---------------------------|-----------------------------------------------|-----------------------------------------------|
| Correlation | HHS with educational<br>status illiterate for 2015/16<br>(%) | .196                      | .237                                          | .256                                          |
|             | HHS not having Degree<br>and above for 2015/16(%)            | .062                      | .088                                          | .066                                          |

**Correlation Matrix<sup>a</sup>**

|             |                                                              | HHS with<br>disability for<br>2015/16(%) | Income per<br>Adult<br>Equivalent per<br>Month for<br>2015/16 | Built-up area<br>per kebele<br>area in m2 |
|-------------|--------------------------------------------------------------|------------------------------------------|---------------------------------------------------------------|-------------------------------------------|
| Correlation | HHS with educational<br>status illiterate for 2015/16<br>(%) | .270                                     | -.469                                                         | .140                                      |
|             | HHS not having Degree<br>and above for 2015/16(%)            | .156                                     | -.237                                                         | -.121                                     |

**Correlation Matrix<sup>a</sup>**

|                 |                                                                      | HHS with<br>educational<br>status illiterate<br>for 2015/16<br>(%) | HHS not<br>having<br>Degree and<br>above for<br>2015/16(%) | HHS<br>employed in<br>self-employed<br>formal for<br>2015/16(%) |
|-----------------|----------------------------------------------------------------------|--------------------------------------------------------------------|------------------------------------------------------------|-----------------------------------------------------------------|
| Sig. (1-tailed) | HHS employed in self-employed formal for 2015/16(%)                  | .479                                                               | .215                                                       | 1.000                                                           |
|                 | Unemployment % from economically active age group(10-64) for 2015/16 | .061                                                               | -.091                                                      | -.168                                                           |
|                 | Female HSS Widowed or Divorced for 2015/16(%)                        | .297                                                               | -.006                                                      | .101                                                            |
|                 | % of HHS with age 65 and above                                       | .249                                                               | -.178                                                      | .020                                                            |
|                 | Population per hectare                                               | .196                                                               | .062                                                       | .268                                                            |
|                 | Green per capita per 1000 population                                 | .237                                                               | .088                                                       | .054                                                            |
|                 | Road area in hectare per 1000population                              | .256                                                               | .066                                                       | .049                                                            |
|                 | HHS with disability for 2015/16(%)                                   | .270                                                               | .156                                                       | .206                                                            |
|                 | Income per Adult Equivalent per Month for 2015/16                    | -.469                                                              | -.237                                                      | -.444                                                           |
|                 | Built-up area per kebele area in m2                                  | .140                                                               | -.121                                                      | .188                                                            |
|                 | HHS with educational status illiterate for 2015/16 (%)               |                                                                    | .003                                                       | .000                                                            |
|                 | HHS not having Degree and above for 2015/16(%)                       | .003                                                               |                                                            | .019                                                            |
|                 | HHS employed in self-employed formal for 2015/16(%)                  | .000                                                               | .019                                                       |                                                                 |
|                 | Unemployment % from economically active age group(10-64) for 2015/16 | .280                                                               | .192                                                       | .054                                                            |
|                 | Female HSS Widowed or Divorced for 2015/16(%)                        | .002                                                               | .477                                                       | .169                                                            |
|                 | % of HHS with age 65 and above                                       | .008                                                               | .044                                                       | .423                                                            |
|                 | Population per hectare                                               | .030                                                               | .278                                                       | .005                                                            |
|                 | Green per capita per 1000 population                                 | .011                                                               | .200                                                       | .303                                                            |

**Correlation Matrix<sup>a</sup>**

|                 |                                                                      | Unemployment % from economically active age group(10-64) for 2015/16 | Female HSS Widowed or Divorced for 2015/16(%) | % of HHS with age 65 and above |
|-----------------|----------------------------------------------------------------------|----------------------------------------------------------------------|-----------------------------------------------|--------------------------------|
|                 | HHS employed in self-employed formal for 2015/16(%)                  | -.168                                                                | .101                                          | .020                           |
|                 | Unemployment % from economically active age group(10-64) for 2015/16 | 1.000                                                                | .268                                          | .082                           |
|                 | Female HSS Widowed or Divorced for 2015/16(%)                        | .268                                                                 | 1.000                                         | .553                           |
|                 | % of HHS with age 65 and above                                       | .082                                                                 | .553                                          | 1.000                          |
|                 | Population per hectare                                               | .232                                                                 | .403                                          | .362                           |
|                 | Green per capita per 1000 population                                 | -.100                                                                | -.054                                         | -.034                          |
|                 | Road area in hectare per 1000population                              | -.157                                                                | -.202                                         | -.178                          |
|                 | HHS with disability for 2015/16(%)                                   | .029                                                                 | .176                                          | .137                           |
|                 | Income per Adult Equivalent per Month for 2015/16                    | .038                                                                 | -.215                                         | .003                           |
|                 | Built-up area per kebele area in m2                                  | .268                                                                 | .460                                          | .407                           |
| Sig. (1-tailed) | HHS with educational status illiterate for 2015/16 (%)               | .280                                                                 | .002                                          | .008                           |
|                 | HHS not having Degree and above for 2015/16(%)                       | .192                                                                 | .477                                          | .044                           |
|                 | HHS employed in self-employed formal for 2015/16(%)                  | .054                                                                 | .169                                          | .423                           |
|                 | Unemployment % from economically active age group(10-64) for 2015/16 |                                                                      | .005                                          | .216                           |
|                 | Female HSS Widowed or Divorced for 2015/16(%)                        | .005                                                                 |                                               | .000                           |
|                 | % of HHS with age 65 and above                                       | .216                                                                 | .000                                          |                                |
|                 | Population per hectare                                               | .013                                                                 | .000                                          | .000                           |
|                 | Green per capita per 1000 population                                 | .170                                                                 | .303                                          | .373                           |

Correlation Matrix<sup>a</sup>

|                 |                                                                      | Population per<br>hectare | Green per<br>capita per<br>1000<br>population | Road area in<br>hectare per<br>1000population<br>n |
|-----------------|----------------------------------------------------------------------|---------------------------|-----------------------------------------------|----------------------------------------------------|
| Sig. (1-tailed) | HHS employed in self-employed formal for 2015/16(%)                  | .268                      | .054                                          | .049                                               |
|                 | Unemployment % from economically active age group(10-64) for 2015/16 | .232                      | -.100                                         | -.157                                              |
|                 | Female HSS Widowed or Divorced for 2015/16(%)                        | .403                      | -.054                                         | -.202                                              |
|                 | % of HHS with age 65 and above                                       | .362                      | -.034                                         | -.178                                              |
|                 | Population per hectare                                               | 1.000                     | -.230                                         | -.448                                              |
|                 | Green per capita per 1000 population                                 | -.230                     | 1.000                                         | .840                                               |
|                 | Road area in hectare per 1000population                              | -.448                     | .840                                          | 1.000                                              |
|                 | HHS with disability for 2015/16(%)                                   | .141                      | -.075                                         | -.138                                              |
|                 | Income per Adult Equivalent per Month for 2015/16                    | -.244                     | -.144                                         | -.173                                              |
|                 | Built-up area per kebele area in m2                                  | .837                      | -.353                                         | -.528                                              |
|                 | HHS with educational status illiterate for 2015/16 (%)               | .030                      | .011                                          | .007                                               |
|                 | HHS not having Degree and above for 2015/16(%)                       | .278                      | .200                                          | .264                                               |
|                 | HHS employed in self-employed formal for 2015/16(%)                  | .005                      | .303                                          | .321                                               |
|                 | Unemployment % from economically active age group(10-64) for 2015/16 | .013                      | .170                                          | .067                                               |
|                 | Female HSS Widowed or Divorced for 2015/16(%)                        | .000                      | .303                                          | .026                                               |
|                 | % of HHS with age 65 and above                                       | .000                      | .373                                          | .044                                               |
|                 | Population per hectare                                               |                           | .011                                          | .000                                               |
|                 | Green per capita per 1000 population                                 | .011                      |                                               | .000                                               |

Correlation Matrix<sup>a</sup>

|                 |                                                                      | HHS with disability for 2015/16(%) | Income per Adult Equivalent per Month for 2015/16 | Built-up area per kebele area in m2 |
|-----------------|----------------------------------------------------------------------|------------------------------------|---------------------------------------------------|-------------------------------------|
| Sig. (1-tailed) | HHS employed in self-employed formal for 2015/16(%)                  | .206                               | -.444                                             | .188                                |
|                 | Unemployment % from economically active age group(10-64) for 2015/16 | .029                               | .038                                              | .268                                |
|                 | Female HSS Widowed or Divorced for 2015/16(%)                        | .176                               | -.215                                             | .460                                |
|                 | % of HHS with age 65 and above                                       | .137                               | .003                                              | .407                                |
|                 | Population per hectare                                               | .141                               | -.244                                             | .837                                |
|                 | Green per capita per 1000 population                                 | -.075                              | -.144                                             | -.353                               |
|                 | Road area in hectare per 1000population                              | -.138                              | -.173                                             | -.528                               |
|                 | HHS with disability for 2015/16(%)                                   | 1.000                              | -.141                                             | .150                                |
|                 | Income per Adult Equivalent per Month for 2015/16                    | -.141                              | 1.000                                             | -.162                               |
|                 | Built-up area per kebele area in m2                                  | .150                               | -.162                                             | 1.000                               |
|                 | HHS with educational status illiterate for 2015/16 (%)               | .004                               | .000                                              | .090                                |
|                 | HHS not having Degree and above for 2015/16(%)                       | .067                               | .011                                              | .123                                |
|                 | HHS employed in self-employed formal for 2015/16(%)                  | .024                               | .000                                              | .035                                |
|                 | Unemployment % from economically active age group(10-64) for 2015/16 | .392                               | .360                                              | .005                                |
|                 | Female HSS Widowed or Divorced for 2015/16(%)                        | .046                               | .019                                              | .000                                |
|                 | % of HHS with age 65 and above                                       | .096                               | .487                                              | .000                                |
|                 | Population per hectare                                               | .082                               | .008                                              | .000                                |
|                 | Green per capita per 1000 population                                 | .231                               | .077                                              | .000                                |

**Correlation Matrix<sup>a</sup>**

|                                                   | HHS with educational status illiterate for 2015/16 (%) | HHS not having Degree and above for 2015/16(%) | HHS employed in self-employed formal for 2015/16(%) |
|---------------------------------------------------|--------------------------------------------------------|------------------------------------------------|-----------------------------------------------------|
| Road area in hectare per 1000population           | .007                                                   | .264                                           | .321                                                |
| HHS with disability for 2015/16(%)                | .004                                                   | .067                                           | .024                                                |
| Income per Adult Equivalent per Month for 2015/16 | .000                                                   | .011                                           | .000                                                |
| Built-up area per kebele area in m2               | .090                                                   | .123                                           | .035                                                |

**Correlation Matrix<sup>a</sup>**

|                                                   | Unemployment % from economically active age group(10-64) for 2015/16 | Female HSS Widowed or Divorced for 2015/16(%) | % of HHS with age 65 and above |
|---------------------------------------------------|----------------------------------------------------------------------|-----------------------------------------------|--------------------------------|
| Road area in hectare per 1000population           | .067                                                                 | .026                                          | .044                           |
| HHS with disability for 2015/16(%)                | .392                                                                 | .046                                          | .096                           |
| Income per Adult Equivalent per Month for 2015/16 | .360                                                                 | .019                                          | .487                           |
| Built-up area per kebele area in m2               | .005                                                                 | .000                                          | .000                           |

**Correlation Matrix<sup>a</sup>**

|                                                   | Population per hectare | Green per capita per 1000 population | Road area in hectare per 1000population |
|---------------------------------------------------|------------------------|--------------------------------------|-----------------------------------------|
| Road area in hectare per 1000population           | .000                   | .000                                 |                                         |
| HHS with disability for 2015/16(%)                | .082                   | .231                                 | .087                                    |
| Income per Adult Equivalent per Month for 2015/16 | .008                   | .077                                 | .044                                    |
| Built-up area per kebele area in m2               | .000                   | .000                                 | .000                                    |



**Correlation Matrix<sup>a</sup>**

|                                                   | HHS with disability for 2015/16(%) | Income per Adult Equivalent per Month for 2015/16 | Built-up area per kebele area in m2 |
|---------------------------------------------------|------------------------------------|---------------------------------------------------|-------------------------------------|
| Road area in hectare per 1000population           | .087                               | .044                                              | .000                                |
| HHS with disability for 2015/16(%)                |                                    | .089                                              | .076                                |
| Income per Adult Equivalent per Month for 2015/16 | .089                               |                                                   | .061                                |
| Built-up area per kebele area in m2               | .076                               | .061                                              |                                     |

**KMO and Bartlett's Test**

|                                                  |                    |
|--------------------------------------------------|--------------------|
| Kaiser-Meyer-Olkin Measure of Sampling Adequacy. | .652               |
| Bartlett's Test of Sphericity                    | Approx. Chi-Square |
|                                                  | 461.879            |
|                                                  | df                 |
|                                                  | 66                 |
|                                                  | Sig.               |
|                                                  | .000               |

### Communalities

|                                                                      | Initial | Extraction |
|----------------------------------------------------------------------|---------|------------|
| HHS with educational status illiterate for 2015/16 (%)               | 1.000   | .687       |
| HHS not having Degree and above for 2015/16(%)                       | 1.000   | .425       |
| HHS employed in self-employed formal for 2015/16(%)                  | 1.000   | .600       |
| Unemployment % from economically active age group(10-64) for 2015/16 | 1.000   | .263       |
| Female HSS Widowed or Divorced for 2015/16(%)                        | 1.000   | .643       |
| % of HHS with age 65 and above                                       | 1.000   | .607       |
| Population per hectare                                               | 1.000   | .702       |
| Green per capita per 1000 population                                 | 1.000   | .807       |
| Road area in hectare per 1000population                              | 1.000   | .906       |
| HHS with disability for 2015/16(%)                                   | 1.000   | .222       |
| Income per Adult Equivalent per Month for 2015/16                    | 1.000   | .548       |
| Built-up area per kebele area in m2                                  | 1.000   | .781       |

Extraction Method: Principal Component Analysis.

**Total Variance Explained**

| Component | Initial Eigenvalues |               |              | Extraction Sums of Squared Loadings |               |              |
|-----------|---------------------|---------------|--------------|-------------------------------------|---------------|--------------|
|           | Total               | % of Variance | Cumulative % | Total                               | % of Variance | Cumulative % |
| 1         | 3.292               | 27.436        | 27.436       | 3.292                               | 27.436        | 27.436       |
| 2         | 2.474               | 20.620        | 48.056       | 2.474                               | 20.620        | 48.056       |
| 3         | 1.424               | 11.869        | 59.925       | 1.424                               | 11.869        | 59.925       |
| 4         | .970                | 8.080         | 68.005       |                                     |               |              |
| 5         | .964                | 8.029         | 76.034       |                                     |               |              |
| 6         | .746                | 6.216         | 82.250       |                                     |               |              |
| 7         | .617                | 5.138         | 87.388       |                                     |               |              |
| 8         | .551                | 4.594         | 91.982       |                                     |               |              |
| 9         | .415                | 3.461         | 95.443       |                                     |               |              |
| 10        | .305                | 2.541         | 97.984       |                                     |               |              |
| 11        | .137                | 1.145         | 99.129       |                                     |               |              |
| 12        | .105                | .871          | 100.000      |                                     |               |              |

**Total Variance Explained**

| Component | Rotation Sums of Squared Loadings |               |              |
|-----------|-----------------------------------|---------------|--------------|
|           | Total                             | % of Variance | Cumulative % |
| 1         | 2.454                             | 20.450        | 20.450       |
| 2         | 2.397                             | 19.971        | 40.421       |
| 3         | 2.341                             | 19.504        | 59.925       |
| 4         |                                   |               |              |
| 5         |                                   |               |              |
| 6         |                                   |               |              |
| 7         |                                   |               |              |
| 8         |                                   |               |              |
| 9         |                                   |               |              |
| 10        |                                   |               |              |
| 11        |                                   |               |              |
| 12        |                                   |               |              |

Extraction Method: Principal Component Analysis.

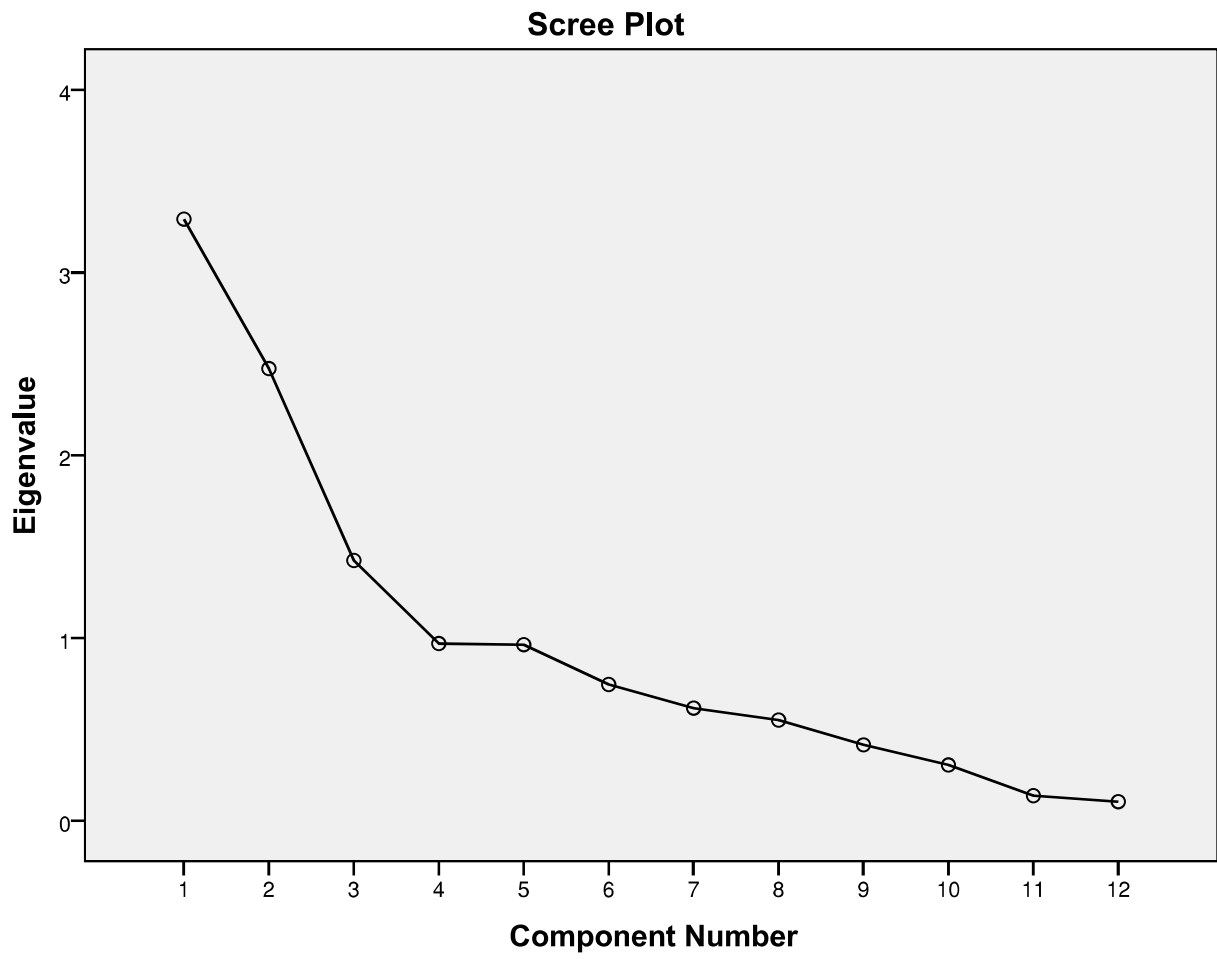

**Component Matrix<sup>a</sup>**

|                                                                      | Component |       |       |
|----------------------------------------------------------------------|-----------|-------|-------|
|                                                                      | 1         | 2     | 3     |
| HHS with educational status illiterate for 2015/16 (%)               | .335      | .755  | .075  |
| HHS not having Degree and above for 2015/16(%)                       | .006      | .449  | -.473 |
| HHS employed in self-employed formal for 2015/16(%)                  | .312      | .601  | -.376 |
| Unemployment % from economically active age group(10-64) for 2015/16 | .331      | -.183 | .347  |
| Female HSS Widowed or Divorced for 2015/16(%)                        | .671      | .140  | .416  |
| % of HHS with age 65 and above                                       | .572      | .018  | .529  |
| Population per hectare                                               | .836      | .009  | -.055 |
| Green per capita per 1000 population                                 | -.428     | .618  | .492  |
| Road area in hectare per 1000population                              | -.601     | .624  | .393  |
| HHS with disability for 2015/16(%)                                   | .334      | .245  | -.226 |
| Income per Adult Equivalent per Month for 2015/16                    | -.285     | -.661 | .172  |
| Built-up area per kebele area in m2                                  | .872      | -.142 | .019  |

Extraction Method: Principal Component Analysis.

a. 3 components extracted.

**Rotated Component Matrix<sup>a</sup>**

|                                                                      | Component |       |       |
|----------------------------------------------------------------------|-----------|-------|-------|
|                                                                      | 1         | 2     | 3     |
| HHS with educational status illiterate for 2015/16 (%)               | .299      | .703  | .323  |
| HHS not having Degree and above for 2015/16(%)                       | -.312     | .572  | -.010 |
| HHS employed in self-employed formal for 2015/16(%)                  | -.020     | .774  | -.024 |
| Unemployment % from economically active age group(10-64) for 2015/16 | .478      | -.168 | -.082 |
| Female HSS Widowed or Divorced for 2015/16(%)                        | .777      | .196  | -.027 |
| % of HHS with age 65 and above                                       | .779      | .009  | .018  |
| Population per hectare                                               | .584      | .371  | -.473 |
| Green per capita per 1000 population                                 | .012      | .097  | .893  |
| Road area in hectare per 1000population                              | -.183     | .076  | .931  |
| HHS with disability for 2015/16(%)                                   | .096      | .432  | -.163 |
| Income per Adult Equivalent per Month for 2015/16                    | -.096     | -.719 | -.147 |
| Built-up area per kebele area in m2                                  | .660      | .232  | -.540 |

Extraction Method: Principal Component Analysis.

Rotation Method: Varimax with Kaiser Normalization.

a. Rotation converged in 6 iterations.

**Component Transformation Matrix**

| Component | 1    | 2     | 3     |
|-----------|------|-------|-------|
| 1         | .742 | .406  | -.533 |
| 2         | .000 | .795  | .606  |
| 3         | .670 | -.450 | .591  |

Extraction Method: Principal Component Analysis.

Rotation Method: Varimax with Kaiser Normalization.

COMPUTE NSMID\_2016=((27.436 / 59.925) \* FAC1\_3) + ((20.620 / 59.925) \* FAC2\_3) + ((11.869 / 59.925) \* (FAC3\_3)).

```

EXECUTE.
SORT CASES BY NSMID_2016 (A).
SORT CASES BY NSMID_2016 (A).
DATASET ACTIVATE DataSet1.
SAVE OUTFILE='C:\Gizachew_article\Third_Journal\analysis\Expenditure_2016_MDI
_Nov2020.sav'
/COMPRESSED.
SORT CASES BY NSMID_2016 (A).
SORT CASES BY NSMID_2016 (D).
COMPUTE SMID_2016=((NSMID_2016) - (-1.3101) / (1.5547 - (-1.3101))).
EXECUTE.
COMPUTE SMID_2016=(NSMID_2016) - (-1.3101) / (1.5547 - (-1.3101)) * 100.
EXECUTE.
SORT CASES BY SMID_2016 (D).
SORT CASES BY NSMID_2016 (A).
SORT CASES BY NSMID_2016 (A).
SORT CASES BY NSMID_2016 (A).
COMPUTE USIMD=(NSMID_2016 - (-1.3101)).
EXECUTE.
SORT CASES BY NSMID_2016 (D).
SORT CASES BY NSMID_2016 (A).
SORT CASES BY NSMID_2016 (D).
SORT CASES BY NSMID_2016 (A).
COMPUTE LSMID=(1.5547 - (-1.3101)).
EXECUTE.
COMPUTE SMID=(USIMD) / (LSMID) * 100.
EXECUTE.
DATASET ACTIVATE DataSet1.
SAVE OUTFILE='C:\Gizachew_article\Third_Journal\analysis\Expenditure_2016_MDI
_Nov2020.sav'
/COMPRESSED.
SORT CASES BY SMID (D).
DATASET ACTIVATE DataSet1.
SAVE OUTFILE='C:\Gizachew_article\Third_Journal\analysis\Expenditure_2016_MDI
_Nov2020.sav'
/COMPRESSED.

SORT CASES BY USIMD (A).
SORT CASES BY NSMID_2016 (A).
SORT CASES BY NSMID_2016 (D).
SORT CASES BY NSMID_2016 (A).
SORT CASES BY NSMID_2016 (D).

```

```
DATASET ACTIVATE DataSet1.
SAVE OUTFILE='C:\Gizachew_article\Third_Journal\analysis\Expenditure_2016_MDI
_Nov2020.sav'
/COMPRESSED.
SORT CASES BY SMID (A).
SORT CASES BY SMID (D).
STRING MDI_Categ (A8).
RECODE SMID (0 thru 20='VLD') (20.01 thru 40='LD') (40.01 thru 60='DE') (60.0
1 thru 80='HD') (80.01 thru 100='VHD') INTO MDI_Categ.
VARIABLE LABELS MDI_Categ 'MDI Category'.
EXECUTE.
DATASET ACTIVATE DataSet1.
SAVE OUTFILE='C:\Gizachew_article\Third_Journal\analysis\Expenditure_2016_MDI
_Nov2020.sav'
/COMPRESSED.
```
